## RESEARCH ARTICLE

# Speech, voice, and language outcomes following deep brain stimulation: A systematic review

Fatemeh Tabari<sup>1</sup>, Joel I. Berger<sup>2</sup>, Oliver Flouty<sup>3</sup>, Brian Copeland<sup>4</sup>, Jeremy D. Greenlee<sup>2,5</sup>, Karim Johari<sup>1\*</sup>

**1** Human Neurophysiology and Neuromodulation Laboratory, Department of Communication Sciences and Disorders, Louisiana State University, Baton Rouge, LA, United States of America, **2** Human Brain Research Laboratory, Department of Neurosurgery, University of Iowa Hospitals and Clinics, Iowa City, IA, United States of America, **3** Department of Neurosurgery and Brain Repair, University of South Florida, Tampa, FL, United States of America, **4** Department of Neurology, LSU Health Sciences Center, New Orleans, LA, United States of America, **5** Iowa Neuroscience Institute, Iowa City, IA, United States of America

\* [karimjohari@lsu.edu](mailto:karimjohari@lsu.edu)

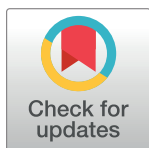

## OPEN ACCESS

**Citation:** Tabari F, Berger JI, Flouty O, Copeland B, Greenlee JD, Johari K (2024) Speech, voice, and language outcomes following deep brain stimulation: A systematic review. PLoS ONE 19(5): e0302739. <https://doi.org/10.1371/journal.pone.0302739>

**Editor:** Li-Hsin Ning, National Taiwan Normal University, TAIWAN

**Received:** September 28, 2023

**Accepted:** April 9, 2024

**Published:** May 10, 2024

**Copyright:** © 2024 Tabari et al. This is an open access article distributed under the terms of the [Creative Commons Attribution License](https://creativecommons.org/licenses/by/4.0/), which permits unrestricted use, distribution, and reproduction in any medium, provided the original author and source are credited.

**Data Availability Statement:** All relevant data are within the manuscript and its [Supporting Information](#) files.

**Funding:** This work was supported by a grant from Louisiana Board of Regent Research Competitiveness Program (award number: AWD-004500).

**Competing interests:** None

## Abstract

### Background

Deep brain stimulation (DBS) reliably ameliorates cardinal motor symptoms in Parkinson's disease (PD) and essential tremor (ET). However, the effects of DBS on speech, voice and language have been inconsistent and have not been examined comprehensively in a single study.

### Objective

We conducted a systematic analysis of literature by reviewing studies that examined the effects of DBS on speech, voice and language in PD and ET.

### Methods

A total of 675 publications were retrieved from PubMed, Embase, CINHALL, Web of Science, Cochrane Library and Scopus databases. Based on our selection criteria, 90 papers were included in our analysis. The selected publications were categorized into four subcategories: *Fluency*, *Word production*, *Articulation and phonology* and *Voice quality*.

### Results

The results suggested a long-term decline in verbal fluency, with more studies reporting deficits in phonemic fluency than semantic fluency following DBS. Additionally, high frequency stimulation, left-sided and bilateral DBS were associated with worse verbal fluency outcomes. Naming improved in the short-term following DBS-ON compared to DBS-OFF, with no long-term differences between the two conditions. Bilateral and low-frequency DBS demonstrated a relative improvement for phonation and articulation. Nonetheless, long-term

DBS exacerbated phonation and articulation deficits. The effect of DBS on voice was highly variable, with both improvements and deterioration in different measures of voice.

## Conclusion

This was the first study that aimed to combine the outcome of speech, voice, and language following DBS in a single systematic review. The findings revealed a heterogeneous pattern of results for speech, voice, and language across DBS studies, and provided directions for future studies.

## Introduction

Parkinson's disease (PD) and Essential Tremor (ET) are prevalent movement disorders characterized by a progressive deterioration of motor functions [1, 2]. There is growing evidence that ET and PD are pathogenically linked, and ET can develop into PD, but not enough to distinguish the biomarkers that predict which ET condition evolve into PD [3]. In a cohort study involving 3,813 older individuals, including both ET cases and controls, patients with ET were found to be four times more likely than controls to develop PD during a prospective follow-up [4]. The diagnosis of PD often involves transcranial ultrasound, revealing hyperechogenicity of the substantia nigra (SN+) in the absence of other abnormalities [5]. Among ET patients, SN + hyperechogenicity is also associated with an increased risk of later developing PD [6, 7]. Moreover, mobility and balance debilitation in ET are attributable to cerebellar dysfunction, whereas PD is a basal ganglia-related disorder [8, 9].

ET studies highlight abnormal bilateral overactivity of cerebral connectivity, as well as altered functional connectivity in the cerebellum, cerebello-thalamico-cortical circuitry and inferior olive-cerebellar network [10–16]. Metabolic, functional and structural abnormalities identified in ET neuroimaging studies, primarily involving Purkinje cells, substantiate the notion that cerebellar and GABAergic dysfunction contribute to the pathophysiology of ET [17–20]. Conversely, pathophysiology of PD centres around disrupted connectivity and functional changes in the basal ganglia, contributing to both motor and non-motor dysfunction in PD populations [8, 21]. In PD, there is a progressive loss of striatal dopamine within the substantia nigra pars compacta (SNc), followed by the dorsal caudate and ventral striatum [22, 23]. Longitudinal PET studies have confirmed striatal gradients of dopamine depletion in PD brains, which anatomically and functionally change frontostriatal loops including motor, cognitive and complex limb loops [23–25]. As PD advances, cortical dopamine depletion, resulting from mesocortical dopamine pathway degeneration, becomes a factor contributing to frontal lobe dysfunction [26, 27].

In addition to primary motor symptoms, individuals with movement disorders often experience speech, voice, and language impairments [28, 29]. These conditions can intricately affect the muscles involved in voice and speech production [1, 30], resulting in noticeable changes such as altered voice quality, reduced vocal loudness [31–33], difficulties with articulation and phonation [34, 35], and disruptions in speech fluency [36, 37]. Among the various non-motor symptoms, language impairments are particularly common in PD, manifesting as deficits in word retrieval, grammar, syntax, and comprehension [29, 38, 39]. It is noteworthy that speech impairment is a nuanced interplay of both motor and non-motor deficits. The act of speech production requires the coordination of multiple motor pathways including respiration,

phonation, articulation, resonance, and prosody [30, 40]. This coordination process is highly complex and finely-tuned, and disruptions in these processes can cause various speech disorders.

Moreover, individuals with PD often experience deficits in voice and articulation, as well as impairments in language functions such as verb inflection [41], verbal fluency [37], and verb generation [42]. These difficulties can cause notable decreases in the accuracy and speed of their verbal communication [28]. Speech production deficits in PD are commonly referred to as hypokinetic dysarthria and are characterized by mono-pitch, mono-loudness, reduced stress, imprecise consonants, breathy or hoarse voice quality, short rushes, and inappropriate silences [43]. A large-scale study analyzing the speech impairment of 200 patients diagnosed with PD revealed that voice impairment is frequently affected and severe in the early stages. Articulation and fluency deficits tend to manifest later, becoming more prominent as the disease progresses to severe stages [44].

While ET has conventionally been classified as a motor disorder, recent insights reveal its notable impact on language and speech abilities [29, 45]. Regarding speech, individuals with ET may experience tremors in the muscles involved in speech production, including the tongue, lips, and vocal cords. Consequently, this tremor activity can manifest as a shaking or unsteady voice, impairing articulation, intelligibility, and overall speech clarity [45, 46]. Tremors can also interfere with the coordination and control of vocal movements, causing issues with rhythm, cadence, and prosody [34, 47]. Furthermore, ET can manifest as a neurological condition affecting various parts of the body or solely as a voice tremor [48]. Some individuals with ET of the voice may not exhibit tremors in their limbs, trunk, or other major postural muscles. Voice tremors, in particular, affect crucial articulators such as the pharyngeal constrictors, intrinsic laryngeal muscles, tongue, soft palate, jaws, and lips. Additionally, these tremors impact the respiratory system musculature and vertical oscillation of the larynx [48, 49].

Deep Brain Stimulation (DBS), an established invasive neuromodulation technique, has shown significant efficacy in alleviating motor symptoms associated with movement disorders including ET, PD, and dystonia [50–53]. However, the effects of DBS on speech, voice and language have yielded mixed outcomes [53–58]. Some evidence suggests that DBS can exert a negative impact on speech, language, and voice by exacerbating pre-treatment deficits [59, 60]. Numerous studies have documented slurring of speech, voice tremor, dysarthria, dysphasia, hypophonia (decrease in speech volume), and dysphagia (swallowing disorder) as adverse effects of DBS, but these studies often lack detailed and comprehensive speech, voice, and language assessments [61–73]. Existing research often incorporates communication skills as subcategories within broader neuropsychological and motor assessments. Despite the identification of adverse effects, there are limited comprehensive analyses that integrate findings across studies to provide a clear understanding of the effects of DBS on these vital aspects of communication. Previous systematic reviews have explored specific facets, such as the impact of DBS on dysphonia and dysarthria [74], utilization of language tasks as outcome measures of DBS treatment [75], comparisons of speech disturbances following thalamic surgery (thalamotomy vs. DBS) [76], and investigation of cognitive functioning following DBS, with language as a subcategory [77].

A systematic review of literature examining the effects of DBS on comprehensive aspects of speech, voice and language is essential for an unbiased assessment of published studies. Such a review can offer insights into the limitations of existing research and guide future directions for investigations in this field. To the best of our knowledge, no comprehensive systematic review currently exists on this specific topic. Therefore, this study aimed to fill this gap by providing a thorough classification of speech, language, and voice outcomes following DBS. The

current review employed established categorizations, including pre- and post-surgery assessments, bilateral versus unilateral stimulation, left versus right hemisphere stimulation, as well as DBS configurations and target location. This approach represents the first systematic and comprehensive analysis of the effects of DBS on several aspects of speech, voice, and language functioning.

In the current study, we combined the ET and PD groups for several reasons. Firstly, these conditions exhibit overlapping motor and non-motor symptoms [36, 43–45, 78–83]. Furthermore, both ET and PD manifest shared speech and language impairments that are not effectively treated, and often exacerbated by DBS treatment [76, 84, 85], for unclear reasons. Finally, the integration of both PD and ET groups allows for an exhaustive analysis with a larger sample size, facilitating a more in-depth understanding of the effects of DBS on speech, language, and voice functioning in both neurological conditions.

## Methods

Our systematic review adhered to PRISMA (Preferred Reporting Items for Systematic Reviews and Meta-Analyses) guidelines [86] and was preregistered with PROSPERO, the international prospective database for systematic reviews (Registration ID: CRD42023453811). No protocol has been published for this systematic review. The PRISMA flowchart is included for the assessment of the systematic review reporting (Fig 1). In adherence to best practice for systematic review, we also included a PRISMA checklist for the comprehensive assessment (S1 Appendix).

### Database search

We employed search strategies involving Boolean operators (AND & OR), nesting to group similar terms, truncation for words with multiple endings, and the use of quotation marks for phrases. This search was conducted across multiple databases, including Pubmed, Embase, CINHALL, Web of Science, Cochrane Library, and Scopus. Medical Subject Headings (MeSH) were utilized as search criteria when available in the databases. Keywords used in the search string were structured as follows: (language OR voice OR speech OR dysarthria) AND (Parkinson\* OR “PD”) AND (Essential Tremor\* OR “ET”) AND (DBS\* OR STN\* OR GPi\* OR ZI\* OR VIM\*). Each identified article was examined to ensure it met the established selection criteria.

For this systematic review, the predefined inclusion criteria were used to extract data from relevant studies. The inclusion criteria for eligible studies are summarized in Table 1. Eligible studies included baseline and follow-up evaluations, and utilized objective measures of speech, language, and voice assessment (such as vowel production, picture naming and fluency tests). Duplicate publications, case reports, case series, non-English studies, editorial reviews, and conference presentations were excluded. Studies relying solely on patients’ self-perception measures, or neurological/clinical assessment, such as Unified Parkinson’s Disease Rating Scale (UPDRS), the Essential Tremor Rating Assessment Scale (TETRAS), and Voice Handicap Index (VHI), as their primary speech, voice and language evaluation tool were also excluded. These criteria ensured the inclusion of studies with reliable measures in the analysis. Moreover, a manual search through the references of selected publications was conducted to identify other potentially relevant articles not obtained by automatic search.

### Data extraction

Using the protocol detailed above, the authors reviewed selected studies, and any discrepancies were resolved by consensus. A systematic search strategy was implemented using the

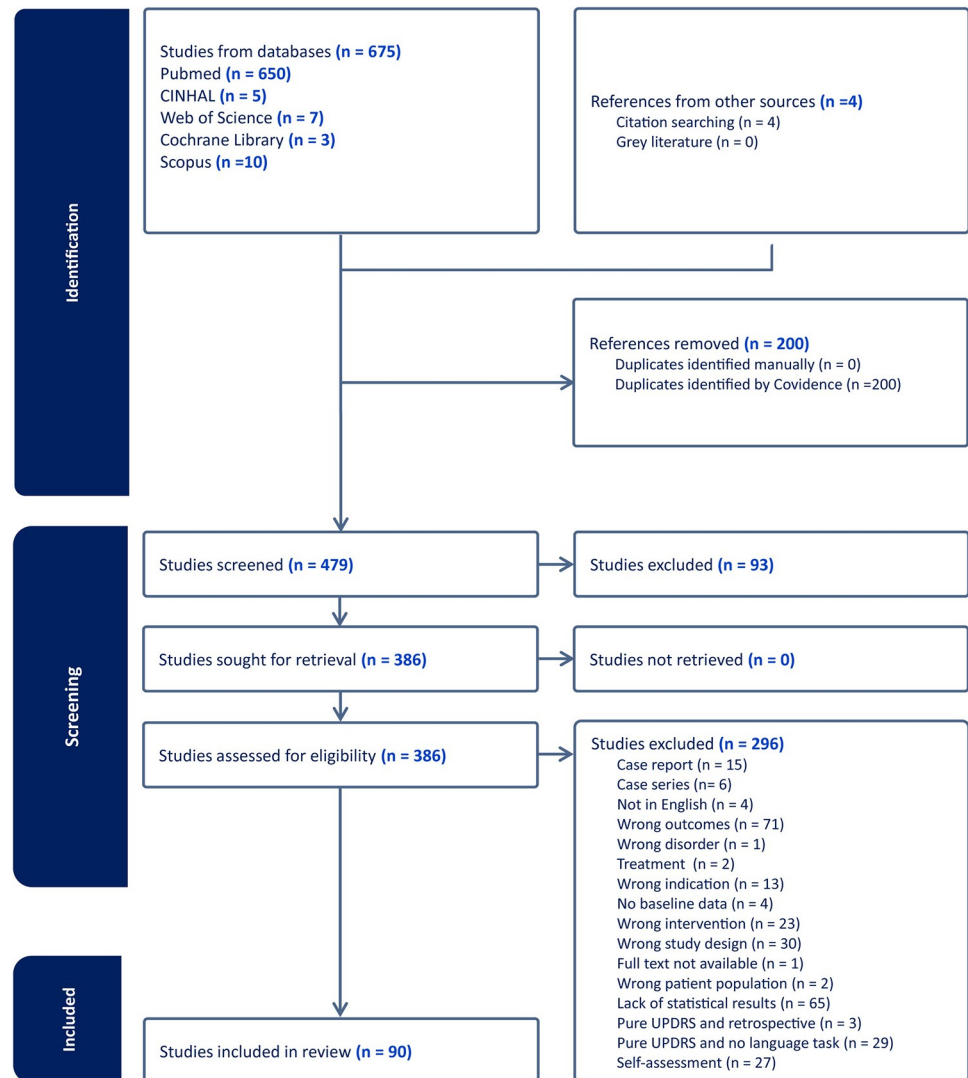

**Fig 1. Study flow diagram.**

<https://doi.org/10.1371/journal.pone.0302739.g001>

Covidence Systematic Review platform [87], which facilitated data screening and quality appraisal. Participant demographics, disease duration, DBS electrode location, follow-up duration, and speech/voice/language outcomes were extracted for the analysis. Additionally, information about the specific language and speech tasks used in each study were also documented to ensure that all relevant data points were collected and analysed. The PRISMA flowchart in Fig 1 summarizes the study selection process outlining the number of studies identified, screened, evaluated for eligibility, and included in the final analysis.

## Results

### Search outcome

A total of 675 articles were retrieved from searching academic databases. After removing 200 duplicate articles that were flagged both manually and using Covidence, 479 studies underwent title and abstract screening. This resulted in 90 studies being excluded, leaving 386 articles for

**Table 1. Summary of inclusion criteria for eligible studies.**

| Criteria               | Description                                                                                                                                                                                                                                                                      |
|------------------------|----------------------------------------------------------------------------------------------------------------------------------------------------------------------------------------------------------------------------------------------------------------------------------|
| Population (P)         | PD and ET patients treated with:—Deep brain stimulation of the subthalamic nucleus (STN-DBS)—globus pallidus internus (GPi-DBS)—ventral intermediate nucleus (VIM-DBS)—caudal zona incerta (cZI-DBS)—the posterior-subthalamic-area (PSA-DBS) [PSA and cZI categorized together] |
| Intervention (I)       | Surgical interventions, including STN-DBS, GPi-DBS, VIM-DBS, cZI-DBS, PSA-DBS                                                                                                                                                                                                    |
| Comparison (C)         | Not applicable (as the focus is on the intervention)                                                                                                                                                                                                                             |
| Outcome (O)            | Speech, voice, and language outcomes following post-surgical intervention                                                                                                                                                                                                        |
| Study Design (S)       | Interventional and observational studies including randomized controlled trials (RCTs), within subject design, cross-sectional, cohort, or case-control studies.                                                                                                                 |
| Language               | Studies published in English                                                                                                                                                                                                                                                     |
| Reporting Clarity      | Clear methods and results with no fragmentation of reporting across multiple publications                                                                                                                                                                                        |
| Publication Time Frame | Peer-reviewed journal publications between January 1999 and January 2023                                                                                                                                                                                                         |

<https://doi.org/10.1371/journal.pone.0302739.t001>

full text retrieval. The 386 studies underwent full text screening, leading to the exclusion of 296 studies for various reasons such as inadequate statistical reporting or lack of baseline data. Ultimately, 90 studies met the final inclusion criteria and were included in our systematic review. Fig 1 depicts the phases of identification, screening, eligibility, and inclusion that comprise the study selection process in PRISMA flow diagram format.

### Study selection and characteristics

The search identified a total of 3660 participants enrolled in 90 DBS studies, including 3293 PD patients (627 medically treated PD patients) (Fig 2). 10 studies were dedicated to patients with ET involving a total of 137 participants. The healthy control group consisted of 230 participants.

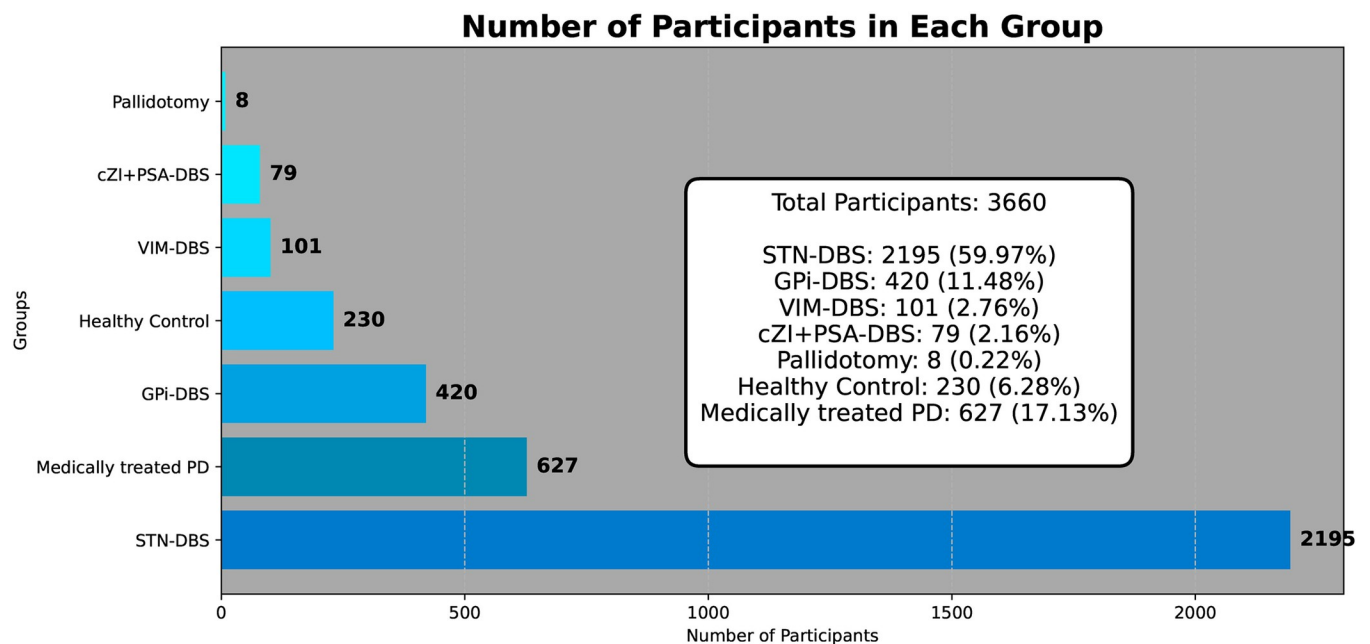

**Fig 2. Distribution of DBS groups against the control groups.**

<https://doi.org/10.1371/journal.pone.0302739.g002>



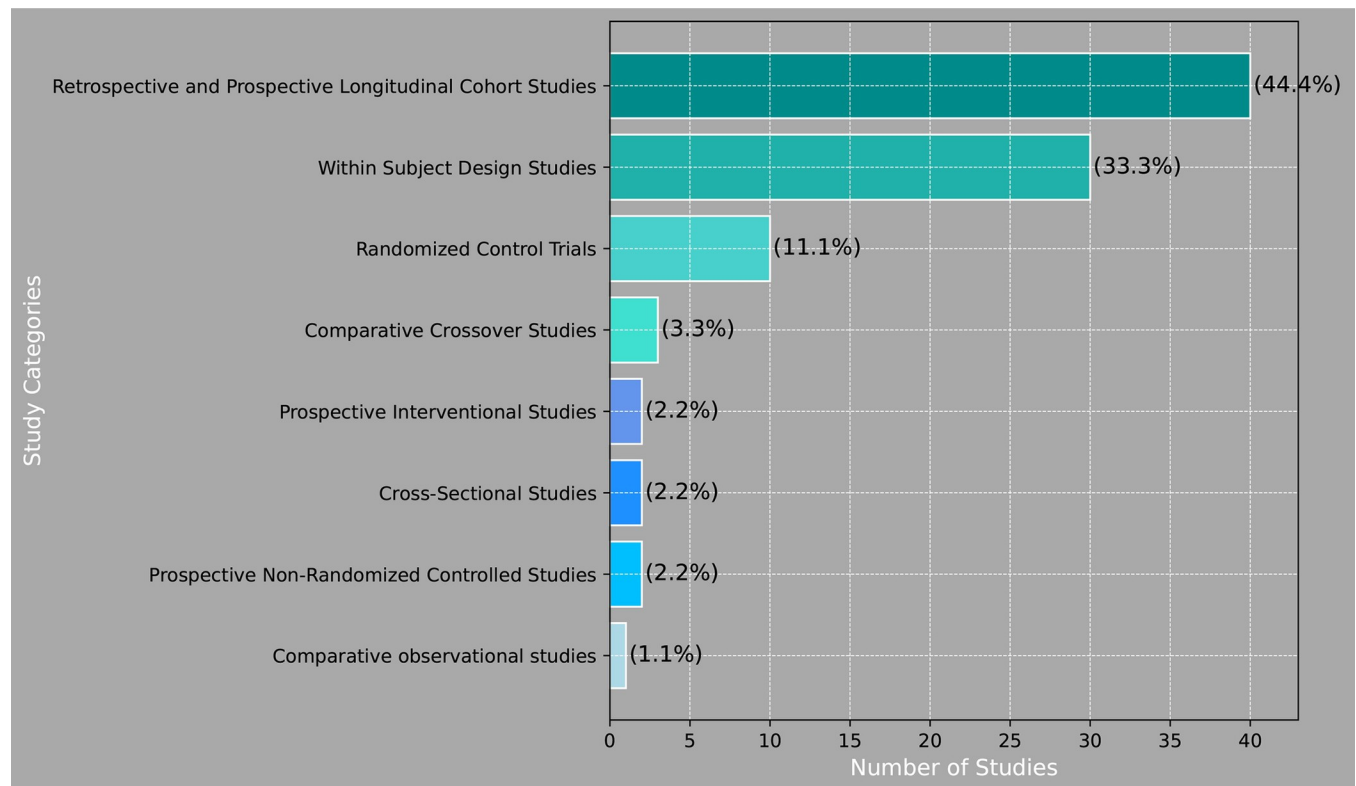

**Fig 3. Distribution of study categories.**

<https://doi.org/10.1371/journal.pone.0302739.g003>

Fig 3 illustrates the distribution of study categories. In this systematic review, we incorporated a diverse range of study designs, including RCTs, cross-sectional studies, prospective non-randomized controlled studies, prospective interventional studies, comparative observational studies, within-subject designs, and cohort studies to gain a comprehensive understanding of the evidence (Fig 3). The majority of the included studies were longitudinal cohort studies providing moderate-quality evidence by enabling the monitoring of outcomes over time. However, these studies are susceptible to confounding factors, such as loss to follow-up and missing data, even with statistical adjustments [88–90]. While RCTs are considered the gold standard for assessing causality and treatment efficacy, our systematic review identified only 10 studies that met the RCT criteria. This comprehensive approach, combining various study designs, allowed us to obtain a broader perspective on the research question and yielded valuable insights into various aspects of the impact of DBS in these patients.

### Bias analysis in the included studies

The risk of bias (low/high/some concern) in RCTs, prospective interventional studies and cross over designs was assessed using the Revised Cochrane risk-of-bias tool for randomized trials (RoB 2) [91]. Upon applying the RoB2 tool, the results revealed some concerns related to potential biases in various domains, uncovering the limitations in methodological quality and conduct. Fig 4 displays the results of the RoB2 assessments.

In our evaluation of studies with within-subject designs, we assessed the potential for bias using the criteria established by Ding et al. [92]. Fig 5 offers a comprehensive evaluation of bias risk based on studies utilizing within-subject experimental designs.

| Study            | Risk of bias domains |    |    |    |    | Overall |
|------------------|----------------------|----|----|----|----|---------|
|                  | D1                   | D2 | D3 | D4 | D5 |         |
| Fraix (2006)     | -                    | +  | +  | +  | -  | -       |
| Rothiland (2007) | +                    | -  | X  | X  | -  | X       |
| Witt (2008)      | +                    | -  | X  | X  | -  | X       |
| Weaver (2009)    | +                    | -  | X  | -  | -  | X       |
| Follet (2010)    | +                    | -  | +  | X  | -  | X       |
| Pedrosa (2014)   | +                    | X  | X  | X  | -  | X       |
| Odekerken (2015) | +                    | -  | +  | +  | -  | X       |
| Rothiland (2015) | +                    | +  | X  | X  | -  | X       |
| Boel (2016)      | +                    | +  | X  | +  | -  | X       |
| Morello (2020)   | +                    | X  | X  | -  | -  | X       |
| Sjöberg (2012)*  | X                    | -  | +  | X  | -  | X       |
| Lundgren (2011)* | X                    | X  | X  | +  | -  | X       |
| Dayal (2020)†    | +                    | +  | X  | +  | -  | X       |
| Schulz (2012)†   | X                    | X  | X  | X  | -  | X       |
| Becker (2020)†   | +                    | +  | X  | +  | -  | X       |

Domains:  
D1: Bias arising from the randomization process.  
D2: Bias due to deviations from intended intervention.  
D3: Bias due to missing outcome data.  
D4: Bias in measurement of the outcome.  
D5: Bias in selection of the reported result.

Judgement  
 High  
 Some concerns  
 Low

**Fig 4. ROB2 tool for bias assessments in RCTs-prospective interventional study (\*)-cross over designs (†).**

<https://doi.org/10.1371/journal.pone.0302739.g004>

The Newcastle-Ottawa Scale (NOS) tool was utilized for assessing the quality of non-randomized studies, particularly cohort and comparative observational studies [93], based on their study design. The risk of bias was evaluated for ‘Selection’, ‘Comparability’ and ‘Outcome’ measures. Each criterion receives a 0–4, 0–2, or 0–3 point score respectively. Studies with total scores of 7+ are high quality, 5–6 are moderate quality, and under 5 are low quality. Summing these scores produces total NOS scores between 0–9. A higher total score reflects better methodological rigor and less bias. Most studies assessed by the NOS scored 6 (53.65%) or 5 (24.39%) out of 9 points. Only 14.63% of the studies showed a high methodological quality. Main flaws were no control groups, blinding, or reporting on participant loss in follow-ups. However, majority of studies had extensive follow-up durations, allowing long-term effect measurements despite these limitations. Detailed results from the NOS are presented in Fig 6.

The risk of bias in Tiedt et al.’s cross-sectional study [94] was assessed using the critical appraisal checklist developed by the Joanna Briggs Institute (JBI) [95]. This checklist aims to assess key components that influence the risk of bias in cross-sectional studies. Tiedt et al. (2021) appropriately matched cases and controls, utilizing consistent criteria. The



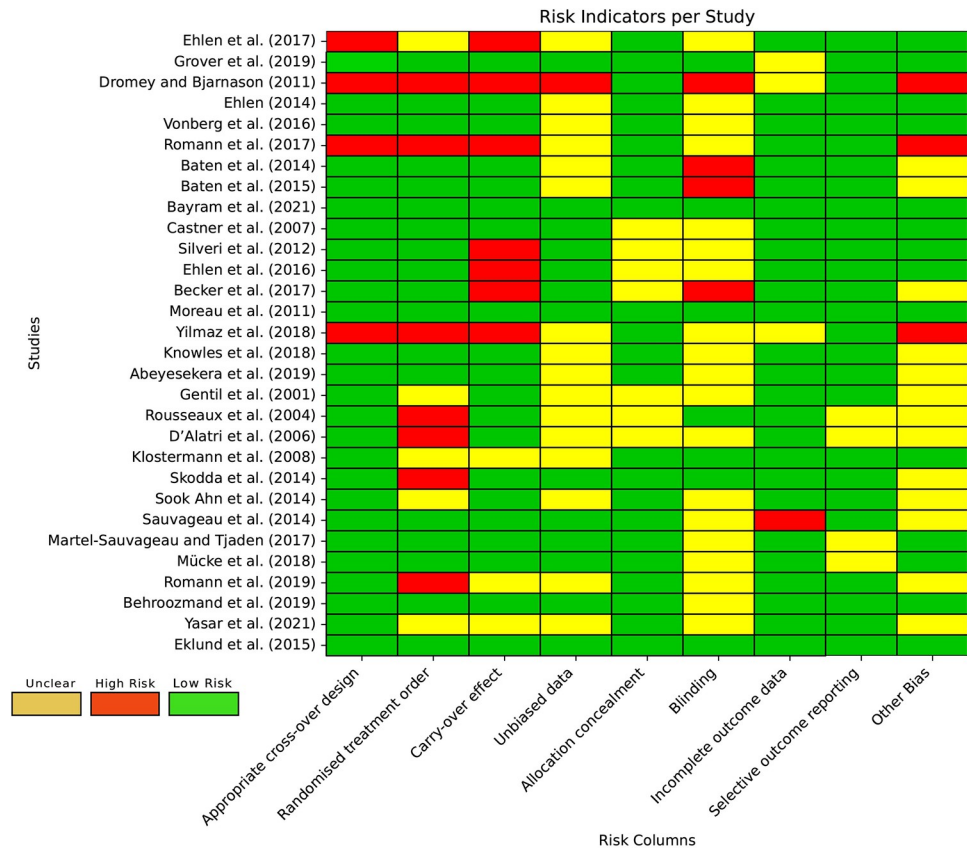

Fig 5. Bias risk assessment in studies utilizing a within-subject experimental design.

<https://doi.org/10.1371/journal.pone.0302739.g005>

measurement of treatment was effective and consistent, and outcomes were assessed thoroughly, meeting quality standards expected in a cross-sectional study design. However, the study was rated as "unclear" regarding the identification of sufficient confounding factors and the use of proper strategies to control for them.

When applying the ROBINS-I ("Risk Of Bias In Non-randomised Studies—of Interventions") tool, the prospective non-randomized controlled studies by Sáez-Zea et al. (2012) and Sandström et al. (2015) exhibited a moderate risk of bias [96, 97]. Both studies showed moderate risk due to confounding factors, with Sáez-Zea et al. (2012) additionally demonstrating a moderate risk around the classification of interventions, while Sandström et al. (2015) exhibited a low bias in this domain. However, Sáez-Zea et al. (2012) demonstrated a moderate risk in selection of participants, serious bias related to missing data, but low bias in the measurement and reporting of outcomes. On the other hand, for Sandström et al. (2015), there was insufficient information to assess bias related to selection, missing data, and reporting. In summary, the overall risk of bias was deemed serious for Sáez-Zea et al. (2012) but moderate for Sandström et al. (2015), based on the available assessments across various bias domains.

### Heterogeneity analysis

Our heterogeneity analysis, conducted using the  $I^2$  statistic, investigated the effects of DBS on verbal fluency, word production, spontaneous language production, phonation and articulation. This analysis revealed differing levels of heterogeneity across these outcome categories. Heterogeneity statistics were calculated for subgroups comprising a minimum of 3 studies

| Study                             | Selection (4) | Comparability (2) | Outcome (3) | Total (9) |
|-----------------------------------|---------------|-------------------|-------------|-----------|
| Borden et al. (2014)              | ***           | *                 | **          | 6         |
| Le Coff et al. (2015)             | **            | *                 | **          | 5         |
| Smeding et al. (2009)             | ***           | *                 | **          | 6         |
| Fabbri et al. (2019)              | ***           | *                 | ***         | 7         |
| Tripoliti et al. (2011)           | ****          | *                 | ***         | 8         |
| Tanaka et al. (2020)              | ***           | *                 | ***         | 7         |
| Tsuboi et al. (2017)              | ***           | *                 | **          | 6         |
| Chiu et al. (2020)                | **            | *                 | **          | 5         |
| Rinhardt et al. (2010)            | ****          | *                 | **          | 7         |
| Demeter et al. 2017               | ***           | *                 | **          | 6         |
| Foley et al. (2017)               | **            | *                 | **          | 5         |
| Smeding et al. (2006)             | ***           | *                 | **          | 6         |
| William et al. (2011)             | ***           | *                 | **          | 6         |
| York et al. (2008)                | ***           | *                 | **          | 6         |
| Saint-Cyr et al. (2000)           | ***           | *                 | **          | 6         |
| Funkiewiez et al. (2004)          | ***           | *                 | ***         | 7         |
| Dujardin et al. (2001)            | **            | *                 | ***         | 6         |
| Gironell et al. (2003)            | ***           | *                 | **          | 6         |
| Fasano et al. (2010)              | **            | *                 | ***         | 6         |
| Philipson et al. (2019)           | **            | *                 | **          | 5         |
| Tanaka et al. (2016)              | ***           | *                 | ***         | 7         |
| You et al. (2020)                 | ***           | *                 | **          | 6         |
| Fyttagorditis et al. (2013)       | **            | *                 | **          | 5         |
| Cilia et al. (2007)               | ***           | *                 | **          | 6         |
| Contario et al. (2007)            | **            | *                 | **          | 5         |
| Castelli et al. (2006)            | ***           | *                 | **          | 6         |
| Castelli et al. (2010)            | ***           | *                 | **          | 6         |
| Rizzone et al. (2014)             | ***           | *                 | **          | 6         |
| Grief et al. (2021)               | **            | *                 | ***         | 6         |
| Catalano Chiuve (2022)            | ***           | *                 | **          | 6         |
| Gaspari et al. (2006)             | **            | *                 | **          | 5         |
| Foki et al. (2016)                | ***           | *                 | **          | 6         |
| Zangaglia et al. (2009)           | ***           | *                 | **          | 6         |
| Pillon et al. (2000)              | ***           | *                 | **          | 6         |
| Heo et al. (2008)                 | **            | *                 | **          | 5         |
| Daniele et al. (2003)             | **            | *                 | **          | 5         |
| Fasano et al. (2010)              | **            | **                | **          | 6         |
| Marshall et al. (2012)            | **            | *                 | **          | 5         |
| Moretti et al. (2003)             | **            | *                 | *           | 4         |
| Whelan et al. (2007)              | **            | *                 | *           | 4         |
| Fabbri et al. (2021) <sup>†</sup> | *             | *                 | *           | 3         |

**Fig 6. NOS assessment of comparative observational<sup>†</sup> and cohort studies.**

<https://doi.org/10.1371/journal.pone.0302739.g006>

with sufficient statistical data. Moreover, data plots were generated for groups with more than 5 studies included in the heterogeneity analysis (Figs 7–9). For verbal fluency, heterogeneity was low for target comparisons ( $I^2 \sim 0\%$ ), but moderate for laterality comparisons ( $I^2 = 59.1\%$ ) and ON versus OFF stimulation comparisons ( $I^2 = 19.6\%$ ), indicating some methodological differences in these subgroups. The high heterogeneity observed in the baseline versus follow-up comparisons ( $I^2 = 62.4\%$ ) in verbal fluency suggests potential sources of variability within the duration of interventions or among patient characteristics.

The observed heterogeneity may stem from variations in intervention durations, encompassing diverse treatment lengths and differing follow-up periods across studies. Additionally, differences in patient characteristics, such as varying disease progression stages or demographic differences among participants, could also account for the observed differences. For word production and spontaneous language, no significant heterogeneity was identified in the baseline versus follow-up analysis ( $I^2 = 0\%$ ). However, phonation and articulation

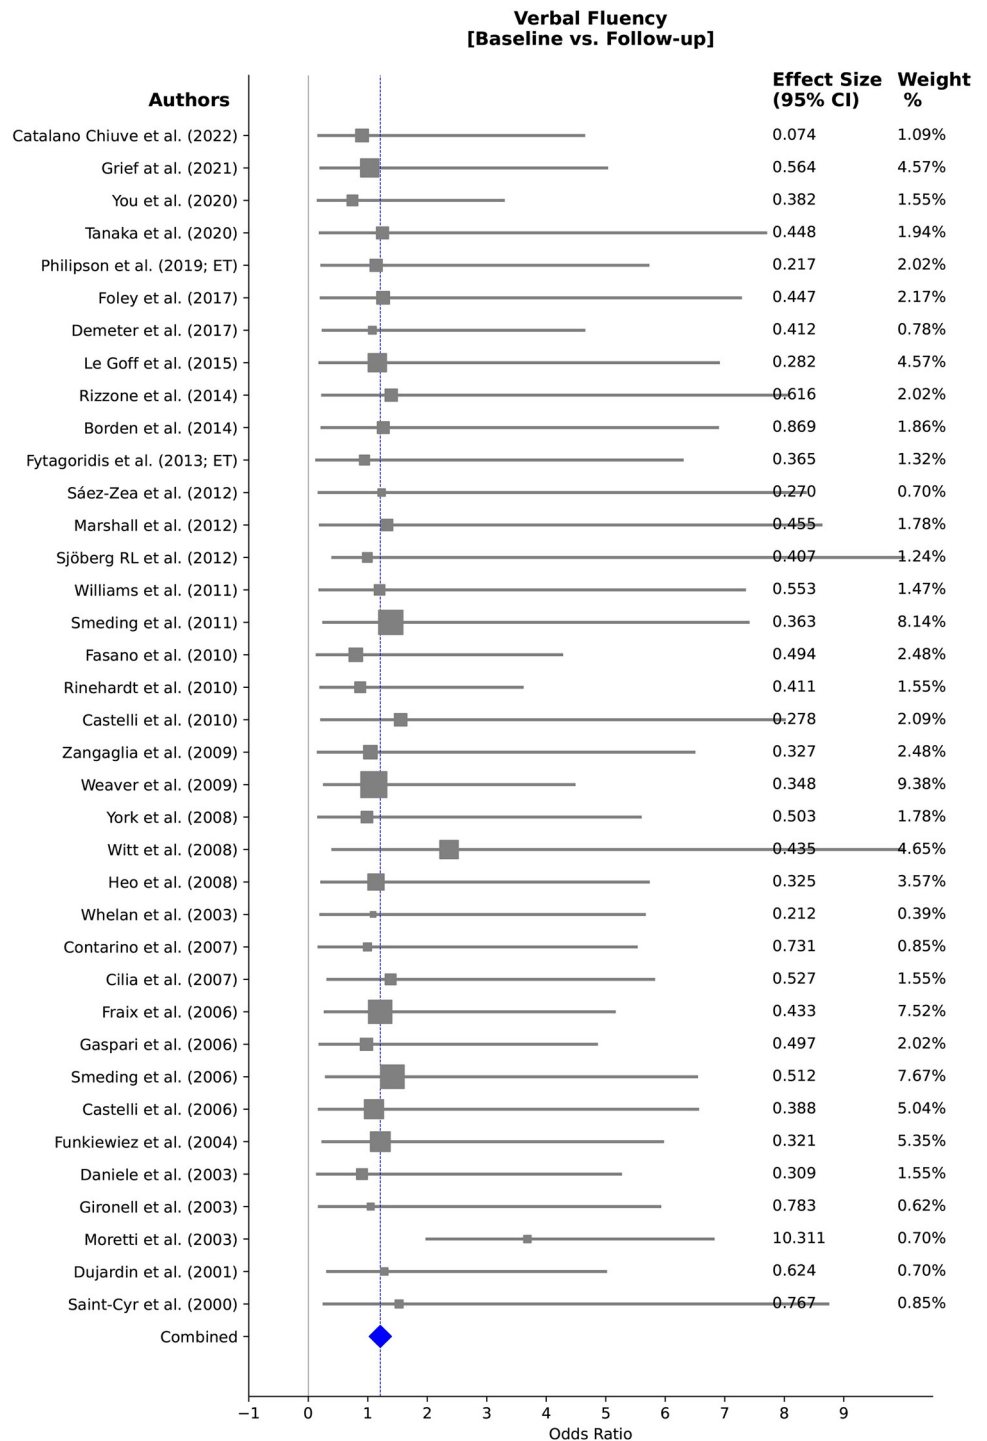

**Fig 7. Forest plot depicting the analysis of verbal fluency in PD and ET patients over follow-ups.** The weight percentage of each study is listed alongside the effect estimate. Substantial heterogeneity is observed ( $I^2$ : 62.40%, 95% CI).

<https://doi.org/10.1371/journal.pone.0302739.g007>

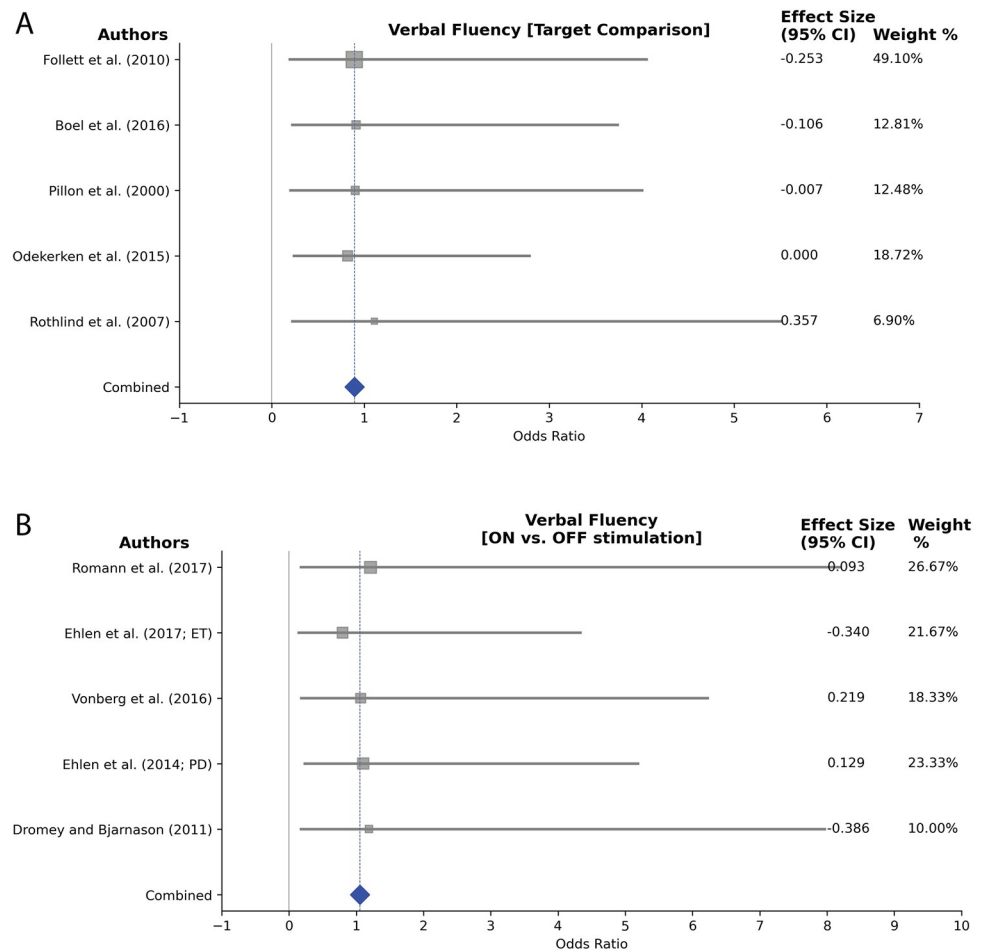

**Fig 8.** Forest plot analysis examining verbal fluency following DBS (A) This subplot compares different targets (STN vs GPi) in PD patients, showing no heterogeneity ( $I^2 = 0.00\%$ , 95% CI). (B) This subplot explores ON versus OFF stimulation status in PD and ET patients (while consistently on medication), indicating minor heterogeneity ( $I^2 = 19.6\%$ , 95% CI). Each study's weight percentage is presented alongside the effect estimate.

<https://doi.org/10.1371/journal.pone.0302739.g008>

heterogeneity analyses showed very high ( $I^2 = 97.9\%$ ) and moderate heterogeneity ( $I^2 = 45.5\%$ ) for high versus low stimulation frequency (60 vs 130 Hz) and ON versus OFF stimulation (for the effects of stimulation on the vocal fundamental frequency (F0)) respectively, indicating substantial variability among these particular subgroups.

Figs 7, 8(A), 8(B), 9(A) and 9(B) showcase forest plots for post-surgery verbal fluency. In Fig 7, the analysis compares baseline versus post-surgery follow-up for verbal fluency in PD and ET patients. Fig 8A focuses on DBS targets, and Fig 8B examines stimulation ON versus OFF status effects in verbal fluency. In Fig 9A, articulation and phonation outcomes following ON versus OFF stimulation status in PD patients are explored, specifically in the vocal fundamental frequency (F0) domain. Fig 9B delves into word production, comparing baseline versus post-surgery follow-up.

## Study appraisal

The quality of evidence was rated according to the Oxford Centre for Evidence-Based Medicine (OCEBM) Levels of Evidence [98]. The OCEBM grades studies from level 1 (strongest) to

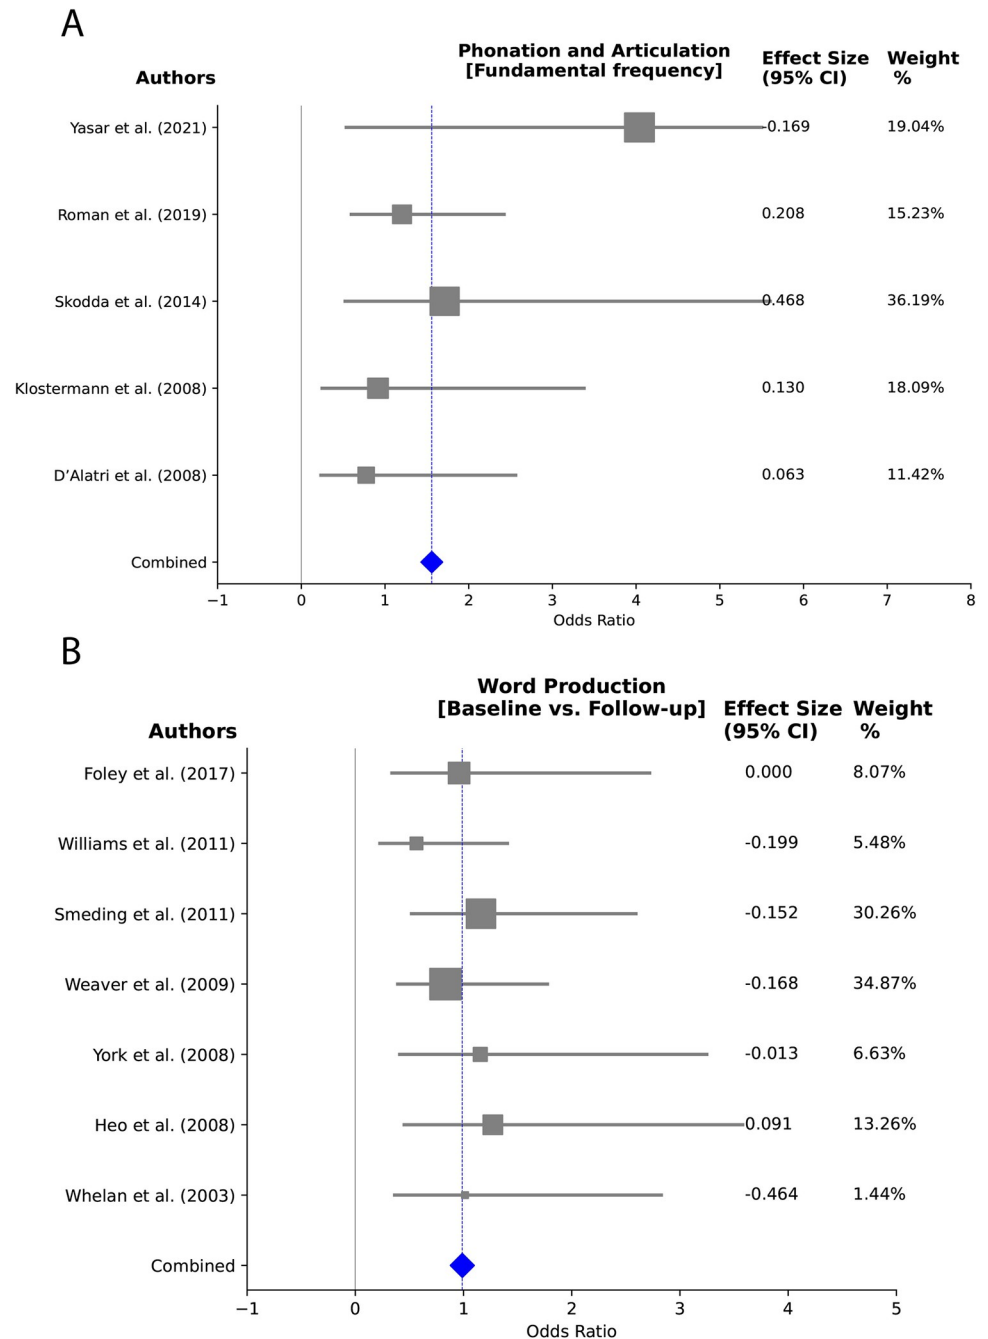

**Fig 9.** Forest plots examining articulation and phonation and word production in PD patients following DBS (A) Articulation and Phonation (F0) in PD patients, revealing moderate heterogeneity ( $I^2$ : 45.50%, 95% CI) in the comparison of ON versus OFF status; (B) Word production over post-surgery follow-ups—no heterogeneity was observed ( $I^2$ : 0.00%, 95% CI). Each study's weight percentage is presented alongside the effect estimate.

<https://doi.org/10.1371/journal.pone.0302739.g009>

level 5 (weakest) based on factors like randomization, blinding, and control groups that influence bias and causality determinations. According to this scheme, randomized controlled trials in our study are classified as level 2 evidence, while the presented cohort studies are considered level 3 evidence. Additionally, other valuable but less rigorous evidence is derived from prospective interventional studies, prospective non-randomized controlled studies, and cross-

over design studies, all ranked as level 4 evidence in this system. Importantly, while the OCEBM scale focuses largely on study design, risk of bias within a study can still influence the interpretation and applicability of evidence. For example, even if a randomized trial with high risk of bias maintains a level 2 ranking for its design, a high risk of bias within the study can undermine confidence in its findings and the overall strength of evidence. Therefore, our evaluation of studies took into account both the assigned OCEBM level and assessments of bias, to ensure a comprehensive analysis.

## Classifications

The results of our review show that DBS can be divided into 4 classes of speech, voice, and language outcomes, including *Fluency* (verbal fluency and repetition rate), *Word production* (such as regular verb production, naming non-manipulated [non-motor] objects and naming action verbs), *Articulation and phonology* (such as vowel space constraints, increased frication during plosive production, dysarthria, speech intelligibility and interpause speech duration), and *Voice quality* (dysphonia and strained voice). Therefore, we classified the studies based on these 4 classes of outcomes and tabulated them in S2-S6 Tables of [S2 Appendix](#). Several studies examined both fluency and word production, or fluency and articulation/phonology, leading to their inclusion in multiple categories for analysis. Likewise, we incorporated some voice measures under the articulation and phonation category, since they are deemed relevant and overlapping in evaluating speech, voice, and language outcomes subsequent to DBS in movement disorders.

We systematically categorized the studies based on several factors including DBS laterality, DBS frequency range, pulse width, DBS target, ON/OFF stimulation, and baseline vs follow-up. The data presented in the [S2 Appendix](#) include essential information such as the lead author's name, patient demographics (number, gender, mean age, disease duration), the disorders examined (PD/ET/PD-ET), stimulation variables (targets [STN/GPi/ cZI+PSA/VIM]), laterality (side of stimulation), frequency (high frequency [HF] vs low frequency [LS]), pulse width (Short Pulse Width vs Standard Pulse Width), language/speech/voice measures and tests, measurement intervals (baseline/post-surgery), along with the corresponding results.

## Verbal fluency

Verbal fluency measures are frequently employed in clinical diagnostic assessments and cognitive and neuropsychological research contexts as part of batteries designed to evaluate executive function, speed, semantic processing, and word knowledge [99]. The primary metric involves the sum of accurately produced words. Semantic (category) fluency tasks, require the respondents to generate words associated with a specific category (e.g., animals) within a designated time frame [100]. On the other hand, phonemic (letter) fluency tasks require participants to generate words that begin with a specified letter [101].

In our reviewed studies, various verbal fluency tasks have been administered, including object naming and animal naming [102, 103] to assess semantic verbal fluency and naming words with specific letters like “V” and “R” or using the FAS sequence (“F,” “A” and “S”) [103–105] to measure phonemic fluency. [S3 Appendix](#) includes the comprehensive list of the tests. A total of 55 studies examined verbal fluency measures, with 44 exclusively focusing on STN-DBS intervention [44, 84, 88, 90, 96, 102, 103, 106–143], 6 comparing STN-DBS with GPi-DBS [89, 90, 105, 144–146], and 1 comparing VIM-DBS with STN-DBS [107]. 2 studies reported on cZI [132, 141] and two on VIM-DBS [36, 147]. A comprehensive list of studies is reported in [S2 Appendix](#).



In target comparison category, we found that the GPi groups comprised a total of 311 participants, whereas the STN group consisted of 362 individuals. Only 13 patients underwent VIM-DBS. In terms of target comparisons for potential differential effects on verbal fluency, in the majority of studies, the results of verbal fluency were comparable in the STN and GPi-DBS comparison [89, 144–146], except for one study in which patients who underwent STN-DBS showed a significant decline in verbal fluency, while those treated by GPi-DBS did not exhibit the same decline [105]. In contrast, two studies found significantly better performance in verbal fluency tasks following STN-DBS compared to GPi (123, 124). When comparing VIM and STN stimulation, it was observed that stimulation of VIM led to a significant decline in verbal fluency among ET patients, whereas it induced a subtle improvement for PD patients who underwent STN-DBS [107]. Notably, only one study [107] included a control group. The absence of control groups and inability to contrast potential DBS effects over time versus disease progression notably weakens the quality of this data.

On the other hand, declines in verbal fluency (15% in semantic fluency and 17% in phonemic fluency) are frequently observed following STN-DBS [148]. The number of studies reporting a decline in phonemic fluency [84, 102, 110, 117, 119, 126, 127, 135, 137, 140] exceeds the number of studies reporting a decline in semantic fluency in patients who underwent STN-DBS [90, 103, 122, 126, 133, 138, 142].

Very limited data exist to examine the effects of DBS laterality on verbal fluency. Namely, only 3 studies [89, 110, 111] involving a total of 70 patients undergoing either unilateral or bilateral DBS have explored the effect of lateralization of DBS on verbal fluency in PD patients. With this limited dataset, it is difficult to draw definitive conclusion in this regard. Several studies suggested that unilateral stimulation of the speech-dominant hemisphere [111] or right hemisphere [89, 110] showed better results in preserving verbal fluency abilities than bilateral stimulation. In a study conducted by Sjöberg et al. (2012) [111], 6 patients were unilaterally operated on the left-side. However, in two cases, due to the disease progression, an electrode was implanted in the right STN at the later stage. While the results for these two cases are inconclusive, the findings suggest that choosing unilateral stimulation over bilateral stimulation is more favourable when it comes to maintaining verbal fluency skills. Nevertheless, the issue of laterality remains a matter of debate, as clinical studies suggest that bilateral STN-DBS can induce subtle impairments in elderly patients [105, 149, 150]. Moreover, the left-sided DBS group exhibits a greater decline in semantic fluency (animal naming) compared to the right-sided STN and GPi DBS group [89]. Furthermore, patients who initially received DBS in the left STN demonstrated a significant decrease in animal naming (semantic) fluency after DBS implantation on the right STN suggesting a lateralized effect of DBS on semantic fluency [89].

Higher amplitude stimulation and more antero-medial locations of active electrodes in STN have been associated with improved phonemic task performance [107]. Furthermore, two studies investigating the influence of DBS frequency on verbal fluency reported that the stimulation frequency can impact verbal fluency performance (11, 87). Low-frequency (LF) stimulation of VLP (VIM) and STN has confirmed favourable effects on certain aspects of verbal fluency in comparison with high-frequency (HF) stimulation or DBS-OFF conditions [36, 108]. Similarly, other studies reported the positive effect of LF (10 Hz) in contrast to HF (130 Hz) on verbal fluency, attributed to the facilitatory effect of LF on cognitive circuit [151], specifically on phonemic fluency which relies heavily on fronto-subcortical functions [152].

However, STN-DBS pulse width manipulation did not reveal any significant long-term effects on verbal fluency [113]. However, the findings from studies comparing ON/OFF stimulation are inconsistent, as some studies reporting no significant effects of STN-DBS in this regard [106, 109], while others reporting alterations in verbal fluency performance across

various stimulation conditions [112, 147, 153]. There was no consistent timeframe for assessments following deactivation of DBS. The assessments were conducted 30 to 60 minutes after turning off the DBS.

The results of the studies on verbal fluency comparing baseline and follow-up visits indicated that majority of PD patients undergoing cZI, GPi and STN-DBS surgery experience a decline in verbal fluency over time, with some study periods spanning from 3 days to several years. Research have shown that verbal fluency tends to decrease in the immediate post-operative period (3 days to 6 months) and some patients experienced a decline in both phonemic and semantic verbal fluency during this period [33, 88, 90, 96, 102, 103, 111, 114, 118, 120, 123–128, 131–134, 138, 142, 154]. However, in certain cases, verbal fluency remained stable 12 months after surgery when compared to assessments conducted immediately post-operatively [139] or returned to the normal range 6 months after the surgery [126] signifying no long-term decline or recovery from immediate postoperative period. Several studies provided medium-term (6 to 12 month) follow-up data on verbal fluency following DBS intervention. Both phonemic and semantic fluency tasks demonstrated significant decreases relative to their respective baseline levels at these time points [33, 88, 103, 116, 122, 130, 136, 140–143]. Long-term studies with more than one-year follow-up periods (e.g., 2, 5, 8, and 11 years), have identified decline in verbal fluency among some patients [84, 111, 115, 119, 121, 131, 135, 137, 155]. The magnitude of decline in phonemic and semantic fluency tasks may be more pronounced in long-term follow-up, specifically more than after 5 years [135], most likely due to disease progression.

In summary, there is a variability of results in verbal fluency following DBS, which may be attributed to factors such as target, the parameters of stimulation, and the duration of follow-up.

## Word production and spontaneous language production

Various language measures were used to evaluate the expressive language abilities of patients, including the Word Naming tests (such as Boston Naming Task (BNT), Korean Boston Naming Test (K-BNT), and Graded Naming Test (GNT)) [44, 156, 157], the Dutch Intelligibility Assessment [158], the Test of Language Competence–Expanded (TLC-E) test [159], The Word Test–Revised (TWT-R) [160], and semi-structural interviews. Please refer to [S3 Appendix](#) for a full list of the tests.

In the context of DBS groups (VIM, STN, GPi), there were a total of 638 patients (including 26 ET patients). 470 and 142 patients underwent STN-DBS and GPi-DBS respectively, while only 26 ET patients were enrolled and received VIM-DBS. The healthy control group comprised 25 individuals and medicinally treated PD (MED-PD) group consisted of 247 patients and healthy control group included 73 individuals. Based on the results of 8 studies, which had follow-up periods ranging from 3 to 12 months, there were no significant changes in word-naming abilities for patients with PD who underwent STN-DBS compared to their baseline performance [33, 90, 96, 123, 131, 136, 138, 143].

Two studies suggested that the laterality of STN-DBS in PD patients does not consistently influence language abilities, as specific effects have been observed under various stimulation conditions [161, 162]. For instance, following left STN stimulation condition, the patients exhibited fewer nouns, increased copula and modal verbs usage, smaller numbers of correct sentences and finiteness index (the ratio of correctly inflected verbs on the total number of clauses that includes a verb) compared to normal values [162]. In contrast, more verb inflection errors and lower proportion of accurate sentences were observed following right STN stimulation [161, 162].

Bilateral STN stimulation has shown positive effects on language production, particularly for the patients who exhibited predominantly right-sided motor dysfunction, with a predominance of left hemisphere dopamine depletion [161]. The effects of unilateral STN stimulation on language production have rarely been studied. The results of one study showed no significant effect of bilateral and unilateral DBS on word naming ability [163]. In contrast, two other studies demonstrated that spontaneous speech was differentially affected by bilateral vs. unilateral stimulation in PD patients [161, 162]. PD patients with unilateral STN-DBS generated a decreased number of nouns, a more extensive range of verbs, and demonstrated deviations from normal values in several syntactic variables. These included an increase in copula and modal verbs, a reduction in the mean length of utterance (MLU: average length of words used in speech), a significant decrease in correct sentences, and a decrease in the finiteness index during spontaneous language production [161].

Interestingly, DBS-OFF demonstrated a negative impact on language abilities in some PD patients [164, 165]. PD patients exhibited slower reaction times and performed worse on naming action tasks when stimulation was OFF, compared to when stimulation was ON or compared to a healthy control group [164, 165]. Accordingly, PD patients performed better on object naming tasks (increased accuracy and quicker reaction times), with fewer semantic errors during the ON stimulation condition [165, 166]. These findings suggest that STN-DBS stimulation may improve or decrease the progression of decline in naming abilities in PD. Although there were no significant long-term effects of STN-DBS on word-naming abilities [123, 125, 136, 138], studies examining the immediate effects of DBS reported better performance following DBS-ON in object naming tasks [164, 165].

A recent study reported the effect of VIM-DBS on language abilities [167]. The patients who underwent VIM-DBS displayed a simplified syntactic structure [167]. Particularly, when examining the effect of VIM-DBS in ON stimulation, a noticeable shift in the syntactic aspect of spontaneous language was observed. This was characterized by an increase in the prevalence of paratactic sentence structures, where the main clause dominated in sentence structure. However, this change in the sentence structure did not affect the correctness, style, or lexicality [167].

Overall, naming ability showed relative improvement following DBS with no difference between STN and GPi targets.

## Phonation and articulation

A diverse array of assessments was used to examine phonation and articulation measures. The studies utilized a variety of tests for evaluating participants' performance in tasks involving multisyllabic utterances, oral diadochokinesis (rapidly and accurately producing a sequence of alternating syllables and sounds for clinical assessment of oral-motor function) abilities and reading standardized texts [110, 137, 168, 169]. Additionally, vowel tasks and articulation tests [106, 170], motor speech dysarthria, speech intelligibility, and voice quality were assessed by administering various scales [137, 171–173]. For the complete list of these tests and in-depth explanations, please see [S3 Appendix](#).

The studies included a total of 549 DBS-PD patients, 74 healthy control participants, and 23 MED-PD participants. Among DBS treated patients, 479 underwent STN DBS, 35 patients received cZI or PSA-DBS, and 35 were treated using VIM-DBS. There was no record of GPi-DBS in these studies. The state of DBS (OFF, Right, Left, and Bilateral) appeared to have an impact on various acoustic parameters, including syllable duration and intensity ratio, as well as on patients' self-estimated "speech ability" (visual analogue scale, VAS), patients' self-reported "ability to speak", speech rate, and intelligibility by naive listeners [174]. One study

examined the impact of STN-DBS placement on speech in PD patients. The results showed that speech was slightly faster when the brain was bilaterally stimulated, compared to no stimulation. However, speech rate and Voice Onset Time (VOT, a measure of speaking timing) were better when only the right side is stimulated or no stimulation was used, than with left side stimulation or both sides stimulated together. In another study, bilateral stimulation of VIM in ET patients significantly increased the duration of syllable production and intensity ratio (relationship between the volume or amplitude of different sound signal components) compared to DBS-OFF and right hemisphere stimulation [174], which is in line with previous research findings [175, 176]. In the VIM bilateral stimulation condition, VAS and speech intelligibility scores were lowest in the right hemisphere stimulation condition. Due to the limited number of studies on this topic, drawing a conclusive judgement is challenging.

Studies that investigated frequency range comparison (comparing LF with HF) were related to STN-DBS. Studies consistently indicate that LF stimulation of STN has a positive impact on speech [108, 177, 178]. One study showed improvements in the articulation of certain vowels at 130 Hz [179] and a significant increase in maximal phonation time (MPT) at 60 Hz compared to 130 Hz and OFF condition following STN-DBS [180]. Moreover, a combination of higher voltage and lower frequency and pulse width has been linked to enhancement of speech outcomes [181]. On the other hand, higher frequency stimulation may have variable effects on vocal control and production, with some studies reporting improvements in vocal production [179], while others suggest a negative impact [180, 182]. However, no statistically significant differences were found in vocal acoustic measurements between low-frequency (60 Hz) and high-frequency (130 Hz) stimulation [172].

The single study examining the impact of pulse width on phonation and articulation in PD patients provided limited evidence to reach a definitive conclusion [113]. The authors found no significant differences in sentence intelligibility test scores between baseline and bilateral short pulse width (30  $\mu$ s) stimulation compared to conventional pulse width (60  $\mu$ s) stimulation. However, the authors suggested potential benefits for patients with dysarthria and a shorter STN-DBS duration with transient pulse width stimulation, which was well tolerated with adverse events compared to conventional pulse width settings [113].

Several studies have explored the impact of ON/OFF stimulation on phonation and articulation in PD patients undergoing DBS [97, 169, 170, 183–193]. Some studies yielded positive effects of DBS on speech parameters, such as a reduced jitter and noise-to-harmonics ratio, improved fundamental frequency (F0), and vocal response to pitch shift, as well as increased phonation time and syllable length [184, 185, 189, 193]. Conversely, other studies found negative effects of DBS, such as diminished speech intelligibility, deteriorated articulation, and reduced vocal response magnitudes [97, 106, 169, 170, 188, 190–192]. Additionally, some others have showed conflicting results for various speech measures [170, 183]. The outcomes appeared to vary based on the specific DBS conditions, patient characteristics, and speech measures evaluated.

DBS target also affected the voice outcomes. A higher percentage of studies reported negative effects of cZI on speech measurements compared to positive effects. A specific study indicated that cZI-DBS had a more negative effect compared to STN-DBS in patients with PD and ET [194]. The cZI group demonstrated a statistically significant decrease in voice intensity during ON-stimulation when compared to OFF-stimulation, pointing towards a negative impact on voice intensity [194]. Additionally, the cZI group showed a significant decrease in voice intensity during the 12-month follow-up, further supporting the negative effect [195]. Posterior subthalamic area (PSA) is another region of interest in DBS studies which encompasses other closely associated structures, such as cZI, pallidothalamic white matter, and the prelemniscal radiation. In one study on ET, there was no significant difference in speech

deterioration between PSA and VIM targets [168]. So, Both PSA and VIM resulted in substantial postoperative speech impairment, suggesting that both had a comparable deleterious impact on speech outcomes [168]. This finding aligns another study where gradual increase in voltage and frequency within PSA led to stimulation-related adverse effects, such as dysarthria and disequilibrium [196]. Overall, these studies suggest that cZI-DBS may have a more detrimental effect on voice intensity and speech outcomes in PD and ET patients than STN-DBS.

Studies investigating the relationship between the duration of follow-up and speech outcomes after DBS in patients with PD indicated a consistent pattern of speech deterioration after approximately one year of STN-DBS [142, 197]. This decline in speech intelligibility was observed in both the ON-medication/ON-stimulation and OFF-medication/OFF-stimulation states. Furthermore, 73% of patients in the STN-DBS group experienced speech impairment in the ON medication/ON stimulation condition at three years after surgery. Another study reported a moderate, yet notable, worsening in global severity grades (intelligibility [baseline:  $1.5 \pm 0.6$  vs one year follow-up:  $1.9 \pm 0.6$ ] and naturalness [baseline:  $2.3 \pm 0.8$  vs one year DBS on:  $2.8 \pm 0.9$ ]) concerning speech in the STN-DBS group after one year of follow-up period [198]. These findings underscore the importance of prolonged monitoring of speech function to detect any potential decline.

In brief, STN-DBS, particularly with low-frequency stimulation, appeared to have beneficial effects on speech. A decline in speech intelligibility was also observed after approximately one year of STN-DBS follow-up.

### Voice quality

Two studies reported varying voice quality measures in individuals with PD who underwent DBS [139, 199]. In one study involving GPi-DBS, significant alterations in prosody were observed, characterised by a decrease in pitch and volume fluctuation, resulting in a flattened prosodic contour [199]. While short-term results did not show a decline in speech intelligibility, the long-term follow-up suggested potential difficulties in maintaining speech clarity over an extended period [199]. In the second study comparing PD patients receiving STN-DBS treatment to those medicinally treated, the PD-DBS group showed a reduced rate of speech compared to their medicinally treated peers after one year [139]. However, the DBS group exhibited enhanced vocal clarity, while MED-PD group showed a deterioration in the quality of vowel articulation. The study suggested that STN-DBS may have a beneficial effect on hypoarticulation, a prominent symptom of hypokinetic dysarthria, contributing to the sustained consistent speech performance even after a 12-month period [139]. Overall, the effect of DBS on voice in PD is mixed. While certain aspects of voice quality and prosody showed improvements following GPi or VIM-DBS, attributed to vocal tremor suppression [139, 200], other studies suggest long-term decline in speech intelligibility [197, 199].

### Discussion

In this systematic review, we present the comprehensive analysis investigating the effects of DBS across a spectrum of speech, language, and voice domains. To summarize, the impact of DBS on verbal fluency is multifaceted and varied. STN-DBS is often associated with declines in both semantic and phonemic verbal fluency, with a notable decrease more pronounced in phonemic fluency compared to semantic fluency. The greater decline in phonemic verbal fluency may be linked to the specific neural pathways implicated in this cognitive process. While semantic verbal fluency involves activation of the ventral inferior frontal gyrus (IFG), phonemic verbal fluency relies more heavily on the dorsal region of IFG [201–203]. Additionally, semantic fluency utilizes the left inferior fronto-occipital fasciculus and anterior thalamic



radiation, while phonemic fluency involves the left superior longitudinal fasciculus and frontal aslant tract [204–206]. Since DBS targeting the STN could impact the latter pathway, this likely explains why phonemic fluency appears disproportionately vulnerable to stimulation-induced effects [207].

LF-DBS demonstrated potential benefits to verbal fluency over HF or no stimulation when targeted to specific brain regions [151]. HF stimulation might disrupt or interfere with the normal firing patterns or synchronization of neurons in the STN and other nuclei [208]. These alterations could potentially affect broader neural circuits involving the basal ganglia, which are interconnected with language-related networks [209].

The precise electrode location in the left hemisphere impacts verbal outcomes [210, 211] with declines in verbal fluency appearing greatest when DBS leads are implanted in the dorsal region of the left STN [212]. Reductions in speech and language skills following bilateral STN-DBS may stem primarily from left-sided stimulation impacts [110, 213]. Stimulation of the left basal ganglia can disrupt speech and verbal fluency to a greater degree than right-sided stimulation or other brain regions [110]. This may be because the left basal ganglia connects to the frontal aslant tract [214], a pathway integral for speech initiation, fluency, and other language functions as part of cortico-basal ganglia-thalamic circuitry [129].

Verbal fluency often declines after DBS surgery but follows variable trajectories in medium- to long-term follow-ups. Some cases stabilize, while others worsen potentially with disease progression. Speech quality and intelligibility also decline within three years post-surgery [142, 197, 198]. Long-term follow-up studies indicate potentially greater declines in both semantic and phonemic fluency over time, which may be attributed to disease progression.

Bilateral STN stimulation may positively impact language production, though evidence conflicts regarding effects on word naming; some studies show no significant impact [163], while others link unilateral DBS to reduced noun production, altered verb patterns, and syntactic changes [215, 216]. Lateralized impacts were highlighted in one study, with left-dominant PD (asymmetric clinical syndrome with left predominance) demonstrating greater noun/verb production accuracy compared to right-dominant patients [217]. A meta-analysis of 572 patients undergoing thalamic surgery found 19.4% experienced postoperative speech problems—10.2% for unilateral procedures and 34.6% with bilateral. Speech difficulty rates following thalamic DBS were higher in ET patients compared to PD groups per the analysis [76].

DBS cessation slows reaction times and worsens action naming versus ON stimulation or healthy controls. Similarly, object naming improves in accuracy and speed during ON versus OFF states. The differential impact of DBS on verbal fluency versus naming abilities could be attributed to the involvement of diverse cortical regions and their unique sensitivity to stimulation. Naming tasks involve a broader neural network encompassing posterior and anterior regions within the peri-Sylvian cortex [163, 218, 219]. Studies suggest the involvement of not only left-hemisphere anterior regions, including the anterior cingulate gyrus and mid-frontal gyrus, but also the classic language areas such as Broca's area [218]. A similar study found activation in right-hemisphere areas homologous to Broca's area, along with expected left-sided activation, during picture naming tasks in people aged 20–82 years old [220]. On the other hand, both STN and GPi targets have shown a beneficial effect in improving naming abilities in PD patients, although the specific effects vary depending on the individual and underlying neurological condition [221]. Additionally, when comparing STN and VIM-DBS, each neural target exhibited distinct effects on word production [94].

Studies on stimulation frequencies consistently show 60Hz (LF) improves STN-DBS speech outcomes like articulation and phonation time, while 130Hz (HF) demonstrates variable vocal effects. This aligns with previous findings suggesting LF optimizes speech with STN stimulation [222, 223]. Recently though, transient short pulse width stimulation displayed dysarthria



improvements and better tolerance versus conventional parameters in shorter-term STN-DBS [113]. The variations in how individuals respond to different stimulation parameters stem from the intricate interplay between DBS settings, the unique anatomy of each person's brain, the extent to which stimulation spreads across neural networks, and individual characteristics such as personality traits and life experiences.

DBS targets differentially impact voice in PD and ET. A greater proportion of studies report speech declines from cZI and STN stimulation. High-amplitude cZI activation may disrupt articulation via the cerebello-rubrospinal pathway [224]. Although cZI more negatively affects intensity versus STN-DBS, PSA and VIM targets also cause significant speech impairment postoperatively, with comparable deleterious effects on outcomes.

Stimulation-induced dysarthria in DBS often presents with left lateralization, supported by more pronounced speech deterioration with left-sided compared to right-sided interventions [43, 197, 225]. This may involve disruption of nearby corticobulbar or cerebellothalamic tracts by common targets like STN and VIM (STN for PD and VIM for ET). Consequently, even minor deviations in electrode placement or intense stimulation might pose considerable risks for speech-related adverse effects [197, 222, 226, 227].

Voice tremor (VT) is another prevalent symptom of PD and ET phenotypes and can result from instability at any level of the speech production mechanism, including respiration, phonation, and articulation [228]. However, the effects of DBS on VT remain elusive. It is worth noting that majority of study participants experienced only mild to moderate VT cases, leaving the efficacy of unilateral cZI-DBS in individuals with more severe VT still a subject of debate [58]. However, data on the effects of voice quality and tremor suppression are limited, warranting further research to better understand the impact of DBS on these aspects in Parkinson's disease.

### Insights from the assessment of risk of bias

Most RCTs exhibit high overall bias risk, impacting confidence due to limitations in outcome measurement, selective reporting, and randomization. Prospective interventional and cross-over studies also show inherent bias concerns. Within-subject experimental studies demonstrate inconsistent risks across criteria, requiring cautious interpretation. Cohort studies, assessed using NOS, show moderate selection rigor, consistent comparability, and variable outcome measurement quality. Case-control and comparative observational studies reveal moderate bias concerns. A single cross-sectional study indicated robust evidence with minor confounding concerns. With 83 studies falling under OCEBM Levels 2 and 3, the majority demonstrate moderate methodological quality.

### Insights from heterogeneity analysis

Our analysis revealed varying degrees of heterogeneity across different aspects of DBS effects. High heterogeneity signals substantial variation among studies, suggesting the need for further investigation through subgroup analyses or meta-regressions. One potential source of this heterogeneity may be the differing sample sizes across studies, ranging from 5 to 299 patients. Overall, heterogeneity appears to depend greatly on the specific outcome and intervention comparison being made.

### Microlesion or progression

The mechanisms underlying voice, speech, and language impairments in PD and ET patients with DBS remain debated. Possible factors include disease progression, postoperative complications like microlesion effects from electrode placement, or a combination of both [197, 229–

231]. Deterioration may also arise from current diffusion impacting corticobulbar fibers, which may potentially be ameliorated by modifying stimulation parameters [232]. In contrast, recent research compared patients who underwent bilateral STN-DBS to those who underwent the same surgery without turning the stimulation ON, and discovered that both groups experienced a modest decline in verbal fluency, with no discernible differences [70]. This suggests that electrical stimulation may not significantly contribute to the decline of verbal fluency and that microlesions caused by DBS surgery may partially contribute to the adverse effects in verbal fluency.

Some studies suggest deteriorating verbal fluency correlates more with the intervention than disease progression itself [124, 233]. Beyond gradual progression of the disease, the effects of intracranial surgery, and medication changes may have contributed to this result [96]. Additional factors like lead placement precision, programming expertise, and PD management quality could also impact DBS outcomes. Finding the optimal programming parameters can be challenging for some patients, resulting in inadequate symptom management and undesirable side effects such as dysarthria [225].

## Conclusion

This review aimed to objectively assess the current state of research on DBS efficacy and potential adverse effects on speech, voice, and language in PD and ET. DBS demonstrates variable impacts on different language aspects, including declining verbal fluency and speech intelligibility over time. Postoperative verbal fluency deficits tend to recover after 6–12 months but longer-term follow-up shows further worsening, potentially indicating disease progression. LF-STN stimulation appears more beneficial for speech versus HF. Limited evidence suggests possible differences in language impacts between unilateral and bilateral STN DBS, but more research is needed to clarify these effects. While naming and voice quality seem relatively stable or improved with DBS, domains like spontaneous speech, phonation, and articulation worsen in some studies.

## Limitations

This review has several limitations. First, inconsistencies across studies and limited data precluded a meta-analysis. Second, the small number of studies per subcategory restricts generalizability and warrants caution in interpreting the results. Third, the lack of analysis on DBS electrode locations impedes comprehending of any correlation between stimulation site and speech/voice/language outcomes.

Furthermore, the methodological quality and execution were moderately or weakly consistent in some cohort studies, possibly impacting validity. Using multiple risk of bias tools across diverse studies may limit comparative assessments. Moreover, our evidence grading (Oxford Levels) focuses substantially on study design while overlooking internal validity concerns. Specifically, although some RCTs were Level 2 evidence, their high risk of bias necessitates cautious interpretation and limits confidence in the results. Thus, the overall body of evidence should be considered carefully regarding the RCTs given their compromised quality and reliability. The actual strength of evidence may reside more with the lower levels here based on methodological factors.

## Future directions

Current evidence cannot strongly support either positive or adverse DBS effects on speech, voice, and language. Divergent findings may stem from poor study design, particularly those indicating deleterious impacts. Inconsistencies may arise not from DBS itself, but flawed

methodologies. Including medically-treated disease controls is critical for better understanding treatment versus DBS effects through direct comparison. Only 15.5% of reviewed studies incorporated healthy controls, while 60% lacked any control group. These issues reveal an immediate need for well-designed, controlled, longitudinal studies to understand long-term DBS effects, clarify inconsistencies, and inform translational optimization of speech, voice and language performance. Elucidating impacts on verbal function facilitates tailoring DBS to maximize motor benefits while minimizing speech and language deficits, through customized modulation of laterality, contacts, voltage, pulse width, and frequency.

## Supporting information

### S1 Checklist. PRISMA checklist.

(DOCX)

### S1 Appendix. PRISMA checklist.

(DOCX)

### S2 Appendix. Study characteristics and results on verbal fluency, word production and spontaneous language production, phonation and articulation and voice quality–Target comparison, laterality, frequency range, pulse width, ON/OFF stimulation.

(DOCX)

### S3 Appendix. Language assessment tools.

(DOCX)

## Author Contributions

**Conceptualization:** Fatemeh Tabari, Karim Johari.

**Data curation:** Fatemeh Tabari.

**Formal analysis:** Fatemeh Tabari, Karim Johari.

**Funding acquisition:** Karim Johari.

**Methodology:** Fatemeh Tabari, Joel I. Berger, Oliver Flouty, Jeremy D. Greenlee, Karim Johari.

**Supervision:** Karim Johari.

**Visualization:** Fatemeh Tabari.

**Writing – original draft:** Fatemeh Tabari.

**Writing – review & editing:** Fatemeh Tabari, Joel I. Berger, Oliver Flouty, Brian Copeland, Jeremy D. Greenlee, Karim Johari.

## References

1. Lopez-de-Ipina K, Sole-Casals J, Sanchez-Mendez JI, Romero-Garcia R, Fernandez E, Requejo C, et al. Analysis of Fine Motor Skills in Essential Tremor: Combining Neuroimaging and Handwriting Biomarkers for Early Management. *Front Hum Neurosci.* 2021; 15:648573. <https://doi.org/10.3389/fnhum.2021.648573> PMID: 34168544
2. Moustafa AA, Chakravarthy S, Phillips JR, Gupta A, Keri S, Polner B, et al. Motor symptoms in Parkinson's disease: A unified framework. *Neurosci Biobehav Rev.* 2016; 68:727–40. <https://doi.org/10.1016/j.neubiorev.2016.07.010> PMID: 27422450
3. Fekete R, Jankovic J. Revisiting the relationship between essential tremor and Parkinson's disease. *Movement Disorders.* 2011; 26(3):391–8. <https://doi.org/10.1002/mds.23512> PMID: 21462256

4. Benito-Leon J, Louis ED, Bermejo-Pareja F. Risk of incident Parkinson's disease and parkinsonism in essential tremor: a population based study. *Journal of Neurology, Neurosurgery & Psychiatry*. 2008; 80(4):423–5.
5. Bouwmans AEP, Vlaar AMM, Srulijes K, Mess WH, Weber WEJ. Transcranial Sonography for the Discrimination of Idiopathic Parkinson's Disease from the Atypical Parkinsonian Syndromes. *Transcranial Sonography in Movement Disorders*. International Review of Neurobiology 2010. p. 121–46. [https://doi.org/10.1016/S0074-7742\(10\)90009-3](https://doi.org/10.1016/S0074-7742(10)90009-3) PMID: 20692498
6. Kim J-S, Oh Y-S, Kim Y-I, Koo J-S, Yang D-W, Lee K-S. Transcranial sonography (TCS) in Parkinson's disease (PD) and essential tremor (ET) in relation with putative premotor symptoms of PD. *Archives of Gerontology and Geriatrics*. 2012; 54(3):e436–e9. <https://doi.org/10.1016/j.archger.2012.01.001> PMID: 22277379
7. Sprenger FS, Wurster I, Seppi K, Stockner H, Scherfler C, Sojer M, et al. Substantia nigra hyperechogenicity and Parkinson's disease risk in patients with essential tremor. *Movement Disorders*. 2016; 31(4):579–83. <https://doi.org/10.1002/mds.26515> PMID: 26893155
8. Wu T, Wang J, Wang C, Hallett M, Zang Y, Wu X, Chan P. Basal ganglia circuits changes in Parkinson's disease patients. *Neuroscience Letters*. 2012; 524(1):55–9. <https://doi.org/10.1016/j.neulet.2012.07.012> PMID: 22813979
9. Gionco JT, Hartstone WG, Martuscello RT, Kuo S-H, Faust PL, Louis ED. Essential Tremor versus "ET-plus": A Detailed Postmortem Study of Cerebellar Pathology. *The Cerebellum*. 2021; 20(6):904–12. <https://doi.org/10.1007/s12311-021-01263-6> PMID: 33768479
10. Wills AJ, Jenkins IH, Thompson PD, Findley LJ, Brooks DJ. Red nuclear and cerebellar but no olivary activation associated with essential tremor: A positron emission tomographic study. *Annals of Neurology*. 2004; 36(4):636–42.
11. Elble RJ. Central Mechanisms of Tremor. *Journal of Clinical Neurophysiology*. 1996; 13(2):133–44. <https://doi.org/10.1097/00004691-199603000-00004> PMID: 8849968
12. Louis ED. Twelve clinical pearls to help distinguish essential tremor from other tremors. *Expert Review of Neurotherapeutics*. 2014; 14(9):1057–65. <https://doi.org/10.1586/14737175.2014.936389> PMID: 25096759
13. Louis ED, Kuo S-H. Introduction. Essential Tremor: Current Concepts and Controversies. *International Review of Neurobiology* 2022. p. 61–4.
14. Louis ED, Faust PL, Vonsattel JPG, Honig LS, Rajput A, Robinson CA, et al. Neuropathological changes in essential tremor: 33 cases compared with 21 controls. *Brain*. 2007; 130(12):3297–307. <https://doi.org/10.1093/brain/awm266> PMID: 18025031
15. Holtbernd F, Shah NJ. Imaging the Pathophysiology of Essential Tremor—A Systematic Review. *Frontiers in Neurology*. 2021;12. <https://doi.org/10.3389/fneur.2021.680254> PMID: 34220687
16. Hallett M. Tremor: Pathophysiology. *Parkinsonism & Related Disorders*. 2014; 20:S118–S22. [https://doi.org/10.1016/S1353-8020\(13\)70029-4](https://doi.org/10.1016/S1353-8020(13)70029-4) PMID: 24262161
17. Deuschl G. Essential tremor and cerebellar dysfunction Clinical and kinematic analysis of intention tremor. *Brain*. 2000; 123(8):1568–80. <https://doi.org/10.1093/brain/123.8.1568> PMID: 10908187
18. Koster B. Essential tremor and cerebellar dysfunction: abnormal ballistic movements. *Journal of Neurology, Neurosurgery & Psychiatry*. 2002; 73(4):400–5. <https://doi.org/10.1136/jnnp.73.4.400> PMID: 12235308
19. Louis ED, Vonsattel JPG, Honig LS, Ross GW, Lyons KE, Pahwa R. Neuropathologic findings in essential tremor. *Neurology*. 2006; 66(11):1756–9. <https://doi.org/10.1212/01.wnl.0000218162.80315.b9> PMID: 16769958
20. Louis ED. Essential tremor and the cerebellum. *The Cerebellum: Disorders and Treatment*. Handbook of Clinical Neurology 2018. p. 245–58. <https://doi.org/10.1016/B978-0-444-64189-2.00016-0> PMID: 29891062
21. Meoni S, Macerollo A, Moro E. Sex differences in movement disorders. *Nature Reviews Neurology*. 2020; 16(2):84–96. <https://doi.org/10.1038/s41582-019-0294-x> PMID: 31900464
22. Smeyne RJ, Gröger A, Kolb R, Schäfer R, Klose U. Dopamine Reduction in the Substantia Nigra of Parkinson's Disease Patients Confirmed by In Vivo Magnetic Resonance Spectroscopic Imaging. *PLoS ONE*. 2014; 9(1).
23. Caligiore D, Helmich RC, Hallett M, Moustafa AA, Timmermann L, Toni I, et al. Parkinson's disease as a system-level disorder. *npj Parkinson's Disease*. 2016; 2(1). <https://doi.org/10.1038/npjparkd.2016.25> PMID: 28725705
24. de la Fuente-Fernández R. Role of DaTSCAN and clinical diagnosis in Parkinson disease. *Neurology*. 2012; 78(10):696–701. <https://doi.org/10.1212/WNL.0b013e318248e520> PMID: 22323748

25. de la Fuente-Fernández R. Imaging of Dopamine in PD and Implications for Motor and Neuropsychiatric Manifestations of PD. *Frontiers in Neurology*. 2013;4.
26. Javoy-Agid F, Agid Y. Is the mesocortical dopaminergic system involved in Parkinson disease? *Neurology*. 1980; 30(12):1326–. <https://doi.org/10.1212/wnl.30.12.1326> PMID: 6109265
27. van Albada SJ, Robinson PA. Mean-field modeling of the basal ganglia-thalamocortical system. I. *Journal of Theoretical Biology*. 2009; 257(4):642–63.
28. Liu L, Luo XG, Dy CL, Ren Y, Feng Y, Yu HM, et al. Characteristics of language impairment in Parkinson's disease and its influencing factors. *Transl Neurodegener*. 2015; 4(1):2. <https://doi.org/10.1186/2047-9158-4-2> PMID: 25685335
29. Janicki SC, Cosentino S, Louis ED. The cognitive side of essential tremor: what are the therapeutic implications? *Ther Adv Neurol Disord*. 2013; 6(6):353–68. <https://doi.org/10.1177/1756285613489591> PMID: 24228071
30. Dashtipour K, Tafreshi A, Lee J, Crawley B. Speech disorders in Parkinson's disease: pathophysiology, medical management and surgical approaches. *Neurodegener Dis Manag*. 2018; 8(5):337–48. <https://doi.org/10.2217/nmt-2018-0021> PMID: 30223711
31. Ruckart KW, Moya-Mendez ME, Nagatsuka M, Barry JL, Siddiqui MS, Madden LL. Comprehensive Evaluation of Voice-Specific Outcomes in Patients With Essential Tremor Before and After Deep Brain Stimulation. *J Voice*. 2022; 36(6):838–46. <https://doi.org/10.1016/j.jvoice.2020.09.013> PMID: 33071149
32. Holmes RJ, Oates JM, Phyland DJ, Hughes AJ. Voice characteristics in the progression of Parkinson's disease. *Int J Lang Commun Disord*. 2000; 35(3):407–18. <https://doi.org/10.1080/136828200410654> PMID: 10963022
33. Heo JH, Lee KM, Paek SH, Kim MJ, Lee JY, Kim JY, et al. The effects of bilateral subthalamic nucleus deep brain stimulation (STN DBS) on cognition in Parkinson disease. *J Neurol Sci*. 2008; 273(1–2):19–24. <https://doi.org/10.1016/j.jns.2008.06.010> PMID: 18640690
34. Silek H, Dogan M. Voice Analysis in Patients with Essential Tremor. *J Voice*. 2023. <https://doi.org/10.1016/j.jvoice.2023.04.019> PMID: 37336699
35. Skodda S, Visser W, Schlegel U. Vowel articulation in Parkinson's disease. *J Voice*. 2011; 25(4):467–72. <https://doi.org/10.1016/j.jvoice.2010.01.009> PMID: 20434876
36. Pedrosa DJ, Auth M, Pauls KA, Runge M, Maarouf M, Fink GR, et al. Verbal fluency in essential tremor patients: the effects of deep brain stimulation. *Brain Stimul*. 2014; 7(3):359–64. <https://doi.org/10.1016/j.brs.2014.02.012> PMID: 24661791
37. Obeso I, Casabona E, Bringas ML, Alvarez L, Jahanshahi M. Semantic and phonemic verbal fluency in Parkinson's disease: Influence of clinical and demographic variables. *Behav Neurol*. 2012; 25(2):111–8. <https://doi.org/10.3233/BEN-2011-0354> PMID: 22530265
38. Smith KM, Ash S, Xie SX, Grossman M. Evaluation of Linguistic Markers of Word-Finding Difficulty and Cognition in Parkinson's Disease. *J Speech Lang Hear Res*. 2018; 61(7):1691–9. [https://doi.org/10.1044/2018\\_JSLHR-L-17-0304](https://doi.org/10.1044/2018_JSLHR-L-17-0304) PMID: 29955824
39. Grossman M, Carvell S, Stern MB, Gollomp S, Hurtig HI. Sentence comprehension in Parkinson's disease: the role of attention and memory. *Brain Lang*. 1992; 42(4):347–84. [https://doi.org/10.1016/0093-934x\(92\)90074-o](https://doi.org/10.1016/0093-934x(92)90074-o) PMID: 1611464
40. Martinez-Sanchez F. [Speech and voice disorders in Parkinson's disease]. *Rev Neurol*. 2010; 51(9):542–50.
41. Peran P, Rascol O, Demonet JF, Celsis P, Nespoulous JL, Dubois B, et al. Deficit of verb generation in nondemented patients with Parkinson's disease. *Mov Disord*. 2003; 18(2):150–6. <https://doi.org/10.1002/mds.10306> PMID: 12539207
42. Crescentini C, Mondolo F, Biasutti E, Shallice T. Supervisory and routine processes in noun and verb generation in nondemented patients with Parkinson's disease. *Neuropsychologia*. 2008; 46(2):434–47. <https://doi.org/10.1016/j.neuropsychologia.2007.08.021> PMID: 17931671
43. Aldridge D, Theodoros D, Angwin A, Vogel AP. Speech outcomes in Parkinson's disease after subthalamic nucleus deep brain stimulation: A systematic review. *Parkinsonism Relat Disord*. 2016; 33:3–11. <https://doi.org/10.1016/j.parkreldis.2016.09.022> PMID: 27693195
44. Ho AK, Iansek R, Marigliani C, Bradshaw JL, Gates S. Speech impairment in a large sample of patients with Parkinson's disease. *Behav Neurol*. 1999; 11(3):131–7. PMID: 22387592
45. Kronenburger M, Konczak J, Ziegler W, Buderath P, Frank B, Coenen VA, et al. Balance and motor speech impairment in essential tremor. *Cerebellum*. 2009; 8(3):389–98. <https://doi.org/10.1007/s12311-009-0111-y> PMID: 19452239



46. Gamboa J, Jimenez-Jimenez FJ, Nieto A, Cobeta I, Vegas A, Orti-Pareja M, et al. Acoustic voice analysis in patients with essential tremor. *J Voice*. 1998; 12(4):444–52. [https://doi.org/10.1016/s0892-1997\(98\)80053-2](https://doi.org/10.1016/s0892-1997(98)80053-2) PMID: 9988031
47. Wang L, Dong J, Chen X, Wang T. [Voice change and acoustic character of essential voice tremor]. *Lin Chuang Er Bi Yan Hou Ke Za Zhi*. 2006; 20(18):817–9. PMID: 17144486
48. Barkmeier-Kraemer JM. Isolated Voice Tremor: A Clinical Variant of Essential Tremor or a Distinct Clinical Phenotype? *Tremor Other Hyperkinet Mov (N Y)*. 2020;10.
49. Paige C, Hopewell BL, Gamsarian V, Myers B, Patel P, Garrett CG, et al. Characterizing the Normative Voice Tremor Frequency in Essential Vocal Tremor. *JAMA Otolaryngol Head Neck Surg*. 2018; 144(12):1169–73. <https://doi.org/10.1001/jamaoto.2018.2566> PMID: 30422171
50. Kremer NI, Pauwels RWJ, Pozzi NG, Lange F, Roothans J, Volkmann J, et al. Deep Brain Stimulation for Tremor: Update on Long-Term Outcomes, Target Considerations and Future Directions. *J Clin Med*. 2021; 10(16). <https://doi.org/10.3390/jcm10163468> PMID: 34441763
51. Krack P, Volkmann J, Tinkhauser G, Deuschl G. Deep Brain Stimulation in Movement Disorders: From Experimental Surgery to Evidence-Based Therapy. *Mov Disord*. 2019; 34(12):1795–810. <https://doi.org/10.1002/mds.27860> PMID: 31580535
52. Medical Advisory S. Deep brain stimulation for Parkinson's disease and other movement disorders: an evidence-based analysis. *Ont Health Technol Assess Ser*. 2005; 5(2):1–56. PMID: 23074471
53. Finger ME, Siddiqui MS, Morris AK, Ruckart KW, Wright SC, Haq IU, et al. Auditory-Perceptual Evaluation of Deep Brain Stimulation on Voice and Speech in Patients With Dystonia. *Journal of Voice*. 2020; 34(4):636–44. <https://doi.org/10.1016/j.jvoice.2019.02.010> PMID: 30879706
54. Pauls KAM, Bröckelmann PJ, Hammesfahr S, Becker J, Hellerbach A, Visser-Vandewalle V, et al. Dysarthria in pallidal Deep Brain Stimulation in dystonia depends on the posterior location of active electrode contacts: a pilot study. *Parkinsonism & Related Disorders*. 2018; 47:71–5. <https://doi.org/10.1016/j.parkreldis.2017.11.002> PMID: 29137852
55. Mucke D, Becker J, Barbe MT, Meister I, Liebhart L, Roettger TB, et al. The effect of deep brain stimulation on the speech motor system. *J Speech Lang Hear Res*. 2014; 57(4):1206–18. [https://doi.org/10.1044/2014\\_JSLHR-S-13-0155](https://doi.org/10.1044/2014_JSLHR-S-13-0155) PMID: 24686442
56. Plaha P, Javed S, Agombar D, G OF, Khan S, Whone A, et al. Bilateral caudal zona incerta nucleus stimulation for essential tremor: outcome and quality of life. *J Neurol Neurosurg Psychiatry*. 2011; 82(8):899–904. <https://doi.org/10.1136/jnnp.2010.222992> PMID: 21285454
57. Matsumoto JY, Fossett T, Kim M, Duffy JR, Strand E, McKeon A, et al. Precise stimulation location optimizes speech outcomes in essential tremor. *Parkinsonism & Related Disorders*. 2016; 32:60–5. <https://doi.org/10.1016/j.parkreldis.2016.08.017> PMID: 27595548
58. Sandstrom L, Blomstedt P, Karlsson F. Long-term effects of unilateral deep brain stimulation on voice tremor in patients with essential tremor. *Parkinsonism Relat Disord*. 2019; 60:70–5. <https://doi.org/10.1016/j.parkreldis.2018.09.029> PMID: 30297208
59. Lee JY, Kondziolka D. Thalamic deep brain stimulation for management of essential tremor. *J Neurosurg*. 2005; 103(3):400–3. <https://doi.org/10.3171/jns.2005.103.3.0400> PMID: 16235669
60. Mirza S, Yazdani U, Dewey Iii R, Patel N, Dewey RB Jr, Miocinovic S, et al. Comparison of Globus Pallidus Interna and Subthalamic Nucleus in Deep Brain Stimulation for Parkinson Disease: An Institutional Experience and Review. *Parkinsons Dis*. 2017; 2017:3410820. <https://doi.org/10.1155/2017/3410820> PMID: 28706748
61. Alesch F, Pinter MM, Helscher RJ, Fertl L, Benabid AL, Koos WT. Stimulation of the ventral intermediate thalamic nucleus in tremor dominated Parkinson's disease and essential tremor. *Acta Neurochir (Wien)*. 1995; 136(1–2):75–81. <https://doi.org/10.1007/BF01411439> PMID: 8748831
62. Benabid AL, Pollak P, Gao D, Hoffmann D, Limousin P, Gay E, et al. Chronic electrical stimulation of the ventralis intermedius nucleus of the thalamus as a treatment of movement disorders. *J Neurosurg*. 1996; 84(2):203–14. <https://doi.org/10.3171/jns.1996.84.2.0203> PMID: 8592222
63. Thobois S, Mertens P, Guenot M, Hermier M, Mollion H, Bouvard M, et al. Subthalamic nucleus stimulation in Parkinson's disease: clinical evaluation of 18 patients. *J Neurol*. 2002; 249(5):529–34. <https://doi.org/10.1007/s004150200059> PMID: 12021940
64. Herzog J, Volkmann J, Krack P, Kopper F, Potter M, Lorenz D, et al. Two-year follow-up of subthalamic deep brain stimulation in Parkinson's disease. *Mov Disord*. 2003; 18(11):1332–7. <https://doi.org/10.1002/mds.10518> PMID: 14639676
65. Plaha P, Patel NK, Gill SS. Stimulation of the subthalamic region for essential tremor. *J Neurosurg*. 2004; 101(1):48–54. <https://doi.org/10.3171/jns.2004.101.1.0048> PMID: 15255251



66. Ostergaard K, Aa Sunde N. Evolution of Parkinson's disease during 4 years of bilateral deep brain stimulation of the subthalamic nucleus. *Mov Disord*. 2006; 21(5):624–31. <https://doi.org/10.1002/mds.20776> PMID: 16283616
67. Kenney C, Simpson R, Hunter C, Ondo W, Almaguer M, Davidson A, et al. Short-term and long-term safety of deep brain stimulation in the treatment of movement disorders. *J Neurosurg*. 2007; 106(4):621–5. <https://doi.org/10.3171/jns.2007.106.4.621> PMID: 17432713
68. Fyttagoridis A, Blomstedt P. Complications and side effects of deep brain stimulation in the posterior subthalamic area. *Stereotact Funct Neurosurg*. 2010; 88(2):88–93. <https://doi.org/10.1159/000271824> PMID: 20068384
69. Zhang K, Bhatia S, Oh MY, Cohen D, Angle C, Whiting D. Long-term results of thalamic deep brain stimulation for essential tremor. *J Neurosurg*. 2010; 112(6):1271–6. <https://doi.org/10.3171/2009.10.JNS09371> PMID: 19911883
70. Okun MS, Gallo BV, Mandybur G, Jagid J, Foote KD, Revilla FJ, et al. Subthalamic deep brain stimulation with a constant-current device in Parkinson's disease: an open-label randomised controlled trial. *Lancet Neurol*. 2012; 11(2):140–9. [https://doi.org/10.1016/S1474-4422\(11\)70308-8](https://doi.org/10.1016/S1474-4422(11)70308-8) PMID: 22239915
71. Huss DS, Dallapiazza RF, Shah BB, Harrison MB, Diamond J, Elias WJ. Functional assessment and quality of life in essential tremor with bilateral or unilateral DBS and focused ultrasound thalamotomy. *Mov Disord*. 2015; 30(14):1937–43. <https://doi.org/10.1002/mds.26455> PMID: 26769606
72. Garcia-Garcia D, Guridi J, Toledo JB, Alegre M, Obeso JA, Rodriguez-Oroz MC. Stimulation sites in the subthalamic nucleus and clinical improvement in Parkinson's disease: a new approach for active contact localization. *J Neurosurg*. 2016; 125(5):1068–79. <https://doi.org/10.3171/2015.9.JNS15868> PMID: 26848922
73. Klein J, Buntjen L, Jacobi G, Galazky I, Panther P, Zaehle T, et al. Bilateral thalamic deep brain stimulation for essential tremor in elderly patients. *J Neural Transm (Vienna)*. 2017; 124(9):1093–6. <https://doi.org/10.1007/s00702-017-1741-8> PMID: 28593500
74. Baudouin R, Lechien JR, Carpentier L, Gurruchaga JM, Lisan Q, Hans S. Deep Brain Stimulation Impact on Voice and Speech Quality in Parkinson's Disease: A Systematic Review. *Otolaryngol Head Neck Surg*. 2023; 168(3):307–18.
75. Vos SH, Kessels RPC, Vinke RS, Esselink RAJ, Piai V. The Effect of Deep Brain Stimulation of the Subthalamic Nucleus on Language Function in Parkinson's Disease: A Systematic Review. *J Speech Lang Hear Res*. 2021; 64(7):2794–810. [https://doi.org/10.1044/2021\\_JSLHR-20-00515](https://doi.org/10.1044/2021_JSLHR-20-00515) PMID: 34157249
76. Alomar S, King NK, Tam J, Bari AA, Hamani C, Lozano AM. Speech and language adverse effects after thalamotomy and deep brain stimulation in patients with movement disorders: A meta-analysis. *Mov Disord*. 2017; 32(1):53–63. <https://doi.org/10.1002/mds.26924> PMID: 28124434
77. Racki V, Hero M, Rozmaric G, Papic E, Raguz M, Chudy D, et al. Cognitive Impact of Deep Brain Stimulation in Parkinson's Disease Patients: A Systematic Review. *Front Hum Neurosci*. 2022; 16:867055. <https://doi.org/10.3389/fnhum.2022.867055> PMID: 35634211
78. Moon S, Song HJ, Sharma VD, Lyons KE, Pahwa R, Akinwuntan AE, et al. Classification of Parkinson's disease and essential tremor based on balance and gait characteristics from wearable motion sensors via machine learning techniques: a data-driven approach. *J Neuroeng Rehabil*. 2020; 17(1):125. <https://doi.org/10.1186/s12984-020-00756-5> PMID: 32917244
79. Gasparini M, Bonifati V, Fabrizio E, Fabbrini G, Brusa L, Lenzi GL, et al. Frontal lobe dysfunction in essential tremor: a preliminary study. *J Neurol*. 2001; 248(5):399–402. <https://doi.org/10.1007/s004150170181> PMID: 11437162
80. Khan T, Westin J, Dougherty M. Classification of speech intelligibility in Parkinson's disease. *Biocybernetics and Biomedical Engineering*. 2014; 34(1):35–45.
81. Vogel AP, McDermott HJ, Perera T, Jones M, Peppard R, McKay CM. The Feasibility of Using Acoustic Markers of Speech for Optimizing Patient Outcomes during Randomized Amplitude Variation in Deep Brain Stimulation: A Proof of Principle Methods Study. *Front Bioeng Biotechnol*. 2015; 3:98. <https://doi.org/10.3389/fbioe.2015.00098> PMID: 26236707
82. Algarni M, Fasano A. The overlap between Essential tremor and Parkinson disease. *Parkinsonism Relat Disord*. 2018; 46 Suppl 1:S101–S4. <https://doi.org/10.1016/j.parkreldis.2017.07.006> PMID: 28729090
83. Tarakad A, Jankovic J. Essential Tremor and Parkinson's Disease: Exploring the Relationship. *Tremor Other Hyperkinet Mov (N Y)*. 2018; 8:589. <https://doi.org/10.7916/D8MD0GVF> PMID: 30643667
84. Fasano A, Romito LM, Daniele A, Piano C, Zinno M, Bentivoglio AR, et al. Motor and cognitive outcome in patients with Parkinson's disease 8 years after subthalamic implants. *Brain*. 2010; 133(9):2664–76. <https://doi.org/10.1093/brain/awq221> PMID: 20802207

85. Finger ME, Madden LL, Haq IU, McLouth CJ, Siddiqui MS. Analysis of the prevalence and onset of dysphonia and dysphagia symptoms in movement disorders at an academic medical center. *J Clin Neurosci*. 2019; 64:111–5. <https://doi.org/10.1016/j.jocn.2019.03.043> PMID: 30948311
86. Moher D, Liberati A, Tetzlaff J, Altman DG, Group P. Preferred reporting items for systematic reviews and meta-analyses: the PRISMA statement. *BMJ*. 2009; 339:b2535. <https://doi.org/10.1136/bmj.b2535> PMID: 19622551
87. Innovation VH. Covidence systematic review software. Melbourne, Australia. 2017.
88. Fraix V, Houeto JL, Lagrange C, Le Pen C, Krystkowiak P, Guehl D, et al. Clinical and economic results of bilateral subthalamic nucleus stimulation in Parkinson's disease. *J Neurosurg Psychiatry*. 2006; 77(4):443–9. <https://doi.org/10.1136/jnnp.2005.077677> PMID: 16543519
89. Rothlind JC, Cockshott RW, Starr PA, Marks WJ, Jr. Neuropsychological performance following staged bilateral pallidal or subthalamic nucleus deep brain stimulation for Parkinson's disease. *J Int Neuropsychol Soc*. 2007; 13(1):68–79.
90. Weaver FM, Follett K, Stern M, Hur K, Harris C, Marks WJ Jr, et al. Bilateral deep brain stimulation vs best medical therapy for patients with advanced Parkinson disease: a randomized controlled trial. *JAMA*. 2009; 301(1):63–73. <https://doi.org/10.1001/jama.2008.929> PMID: 19126811
91. Sterne JAC, Savovic J, Page MJ, Elbers RG, Blencowe NS, Boutron I, et al. RoB 2: a revised tool for assessing risk of bias in randomised trials. *BMJ*. 2019; 366:l4898. <https://doi.org/10.1136/bmj.l4898> PMID: 31462531
92. Ding H, Hu GL, Zheng XY, Chen Q, Threapleton DE, Zhou ZH. The method quality of cross-over studies involved in Cochrane Systematic Reviews. *PLoS One*. 2015; 10(4):e0120519. <https://doi.org/10.1371/journal.pone.0120519> PMID: 25867772
93. Wells G, Shea B, O'Connell D, Peterson J, Welch V, Losos M, et al. The Newcastle–Ottawa Scale (NOS) for Assessing the Quality of Non-Randomized Studies in Meta-Analysis. 2000.
94. Tiedt HO, Ehlen F, Wyrobnik M, Klostermann F. Thalamic but Not Subthalamic Neuromodulation Simplifies Word Use in Spontaneous Language. *Front Hum Neurosci*. 2021; 15:656188. <https://doi.org/10.3389/fnhum.2021.656188> PMID: 34093151
95. Moola S, Munn Z, Tufanaru C, Aromataris E, Sears K, Sfetici R, et al. Chapter 7: Systematic reviews of etiology and risk. *JBI Reviewer's Manual* 2019.
96. Sáez-Zea C, Escamilla-Sevilla F, Katati MJ, Minguez-Castellanos A. Cognitive effects of subthalamic nucleus stimulation in Parkinson's disease: a controlled study. *Eur Neurol*. 2012; 68(6):361–6. <https://doi.org/10.1159/000341380> PMID: 23095782
97. Sandström L, Hagglund P, Johansson L, Blomstedt P, Karlsson F. Speech intelligibility in Parkinson's disease patients with zona incerta deep brain stimulation. *Brain Behav*. 2015; 5(10):e00394. <https://doi.org/10.1002/brb3.394> PMID: 26516614
98. Howick JCI, Glasziou P. OCEBM Levels of Evidence Working Group 'The Oxford 2011 Levels of Evidence': Oxford Centre for Evidence-Based Medicine.: Oxford; 2011.
99. Amunts J, Camilleri JA, Eickhoff SB, Patil KR, Heim S, von Polier GG, et al. Comprehensive verbal fluency features predict executive function performance. *Sci Rep*. 2021; 11(1):6929. <https://doi.org/10.1038/s41598-021-85981-1> PMID: 33767208
100. Hurks PP, Vles JS, Hendriksen JG, Kalf AC, Feron FJ, Kroes M, et al. Semantic category fluency versus initial letter fluency over 60 seconds as a measure of automatic and controlled processing in healthy school-aged children. *J Clin Exp Neuropsychol*. 2006; 28(5):684–95. <https://doi.org/10.1080/13803390590954191> PMID: 16723317
101. Biesbroek JM, van Zandvoort MJ, Kappelle LJ, Velthuis BK, Biessels GJ, Postma A. Shared and distinct anatomical correlates of semantic and phonemic fluency revealed by lesion-symptom mapping in patients with ischemic stroke. *Brain Struct Funct*. 2016; 221(4):2123–34. <https://doi.org/10.1007/s00429-015-1033-8> PMID: 25939335
102. Dujardin K, Defebvre L, Krystkowiak P, Blond S, Destee A. Influence of chronic bilateral stimulation of the subthalamic nucleus on cognitive function in Parkinson's disease. *J Neurol*. 2001; 248(7):603–11. <https://doi.org/10.1007/s004150170139> PMID: 11518003
103. Gironell A, Kulisevsky J, Rami L, Fortuny N, Garcia-Sanchez C, Pascual-Sedano B. Effects of pallidotomy and bilateral subthalamic stimulation on cognitive function in Parkinson disease. A controlled comparative study. *J Neurol*. 2003; 250(8):917–23. <https://doi.org/10.1007/s00415-003-1109-x> PMID: 12928909
104. Cardebat D, Doyon B, Puel M, Goulet P, Joannette Y. [Formal and semantic lexical evocation in normal subjects. Performance and dynamics of production as a function of sex, age and educational level]. *Acta Neurol Belg*. 1990; 90(4):207–17.

105. Pillon B, Ardouin C, Damier P, Krack P, Houeto JL, Klinger H, et al. Neuropsychological changes between "off" and "on" STN or GPI stimulation in Parkinson's disease. *Neurology*. 2000; 55(3):411–8. <https://doi.org/10.1212/wnl.55.3.411> PMID: 10932277
106. Dromey C, Bjarnason S. A preliminary report on disordered speech with deep brain stimulation in individuals with Parkinson's disease. *Parkinsons Dis*. 2011; 2011:796205. <https://doi.org/10.4061/2011/796205> PMID: 22046577
107. Ehlen F, Schoenecker T, Kuhn AA, Klostermann F. Differential effects of deep brain stimulation on verbal fluency. *Brain Lang*. 2014; 134:23–33. <https://doi.org/10.1016/j.bandl.2014.04.002> PMID: 24815947
108. Grover T, Georgiev D, Kalliola R, Mahlknecht P, Zacharia A, Candelario J, et al. Effect of Low versus High Frequency Subthalamic Deep Brain Stimulation on Speech Intelligibility and Verbal Fluency in Parkinson's Disease: A Double-Blind Study. *J Parkinsons Dis*. 2019; 9(1):141–51. <https://doi.org/10.3233/JPD-181368> PMID: 30594934
109. Romann AJ, Beber BC, Olchik MR, Rieder CRM. Different outcomes of phonemic verbal fluency in Parkinson's disease patients with subthalamic nucleus deep brain stimulation. *Arch Neuropsychiatr*. 2017; 75(4):216–20. <https://doi.org/10.1590/0004-282X20170024> PMID: 28489140
110. Schulz GM, Hosey LA, Bradberry TJ, Stager SV, Lee L-C, Pawha R, et al. Selective Left, Right and Bilateral Stimulation of Subthalamic Nuclei in Parkinson's Disease: Differential Effects on Motor, Speech and Language Function. *Journal of Parkinson's Disease*. 2012; 2(1):29–40. <https://doi.org/10.3233/JPD-2012-11049> PMID: 23939406
111. Sjöberg RL, Lidman E, Haggstrom B, Hariz MI, Linder J, Fredricks A, et al. Verbal fluency in patients receiving bilateral versus left-sided deep brain stimulation of the subthalamic nucleus for Parkinson's disease. *J Int Neuropsychol Soc*. 2012; 18(3):606–11. <https://doi.org/10.1017/S1355617711001925> PMID: 22264411
112. Vonberg I, Ehlen F, Fromm O, Kuhn AA, Klostermann F. Deep Brain Stimulation of the Subthalamic Nucleus Improves Lexical Switching in Parkinsons Disease Patients. *PLoS One*. 2016; 11(8): e0161404. <https://doi.org/10.1371/journal.pone.0161404> PMID: 27575379
113. Dayal V, Grover T, Tripoliti E, Milabo C, Salazar M, Candelario-McKeown J, et al. Short Versus Conventional Pulse-Width Deep Brain Stimulation in Parkinson's Disease: A Randomized Crossover Comparison. *Mov Disord*. 2020; 35(1):101–8. <https://doi.org/10.1002/mds.27863> PMID: 31571270
114. Saint-Cyr JA, Trepanier LL, Kumar R, Lozano AM, Lang AE. Neuropsychological consequences of chronic bilateral stimulation of the subthalamic nucleus in Parkinson's disease. *Brain*. 2000; 123 (Pt 10):2091–108. <https://doi.org/10.1093/brain/123.10.2091> PMID: 11004126
115. Contarino MF, Daniele A, Sibilia AH, Romito LM, Bentivoglio AR, Gainotti G, et al. Cognitive outcome 5 years after bilateral chronic stimulation of subthalamic nucleus in patients with Parkinson's disease. *J Neurol Neurosurg Psychiatry*. 2007; 78(3):248–52. <https://doi.org/10.1136/jnnp.2005.086660> PMID: 16690696
116. Moretti R, Torre P, Antonello RM, Capus L, Marsala SZ, Cattaruzza T, et al. Neuropsychological changes after subthalamic nucleus stimulation: a 12 month follow-up in nine patients with Parkinson's disease. *Parkinsonism Relat Disord*. 2003; 10(2):73–9. [https://doi.org/10.1016/s1353-8020\(03\)00073-7](https://doi.org/10.1016/s1353-8020(03)00073-7) PMID: 14643996
117. Castelli L, Perozzo P, Zibetti M, Crivelli B, Morabito U, Lanotte M, et al. Chronic deep brain stimulation of the subthalamic nucleus for Parkinson's disease: effects on cognition, mood, anxiety and personality traits. *Eur Neurol*. 2006; 55(3):136–44. <https://doi.org/10.1159/000093213> PMID: 16682797
118. Daniele A, Albanese A, Contarino MF, Zinzi P, Barbier A, Gasparini F, et al. Cognitive and behavioural effects of chronic stimulation of the subthalamic nucleus in patients with Parkinson's disease. *J Neurol Neurosurg Psychiatry*. 2003; 74(2):175–82. <https://doi.org/10.1136/jnnp.74.2.175> PMID: 12531943
119. Funkiewiez A, Ardouin C, Caputo E, Krack P, Fraix V, Klinger H, et al. Long term effects of bilateral subthalamic nucleus stimulation on cognitive function, mood, and behaviour in Parkinson's disease. *J Neurol Neurosurg Psychiatry*. 2004; 75(6):834–9. <https://doi.org/10.1136/jnnp.2002.009803> PMID: 15145995
120. Smeding HM, Speelman JD, Koning-Haanstra M, Schuurman PR, Nijssen P, van Laar T, et al. Neuropsychological effects of bilateral STN stimulation in Parkinson disease: a controlled study. *Neurology*. 2006; 66(12):1830–6. <https://doi.org/10.1212/01.wnl.0000234881.77830.66> PMID: 16801645
121. De Gaspari D, Siri C, Di Gioia M, Antonini A, Isella V, Pizzolato A, et al. Clinical correlates and cognitive underpinnings of verbal fluency impairment after chronic subthalamic stimulation in Parkinson's disease. *Parkinsonism Relat Disord*. 2006; 12(5):289–95. <https://doi.org/10.1016/j.parkreldis.2006.01.001> PMID: 16554183

122. Cilia R, Siri C, Marotta G, De Gaspari D, Landi A, Mariani CB, et al. Brain networks underlining verbal fluency decline during STN-DBS in Parkinson's disease: an ECD-SPECT study. *Parkinsonism Relat Disord.* 2007; 13(5):290–4. <https://doi.org/10.1016/j.parkreldis.2006.11.011> PMID: 17292655
123. Whelan BM, Murdoch BE, Theodoros DG, Hall B, Silburn P. Defining a role for the subthalamic nucleus within operative theoretical models of subcortical participation in language. *J Neurol Neurosurg Psychiatry.* 2003; 74(11):1543–50. <https://doi.org/10.1136/jnnp.74.11.1543> PMID: 14617713
124. Witt K, Daniels C, Reiff J, Krack P, Volkmann J, Pinski MO, et al. Neuropsychological and psychiatric changes after deep brain stimulation for Parkinson's disease: a randomised, multicentre study. *Lancet Neurol.* 2008; 7(7):605–14. [https://doi.org/10.1016/S1474-4422\(08\)70114-5](https://doi.org/10.1016/S1474-4422(08)70114-5) PMID: 18538636
125. York MK, Dulay M, Macias A, Levin HS, Grossman R, Simpson R, et al. Cognitive declines following bilateral subthalamic nucleus deep brain stimulation for the treatment of Parkinson's disease. *J Neurol Neurosurg Psychiatry.* 2008; 79(7):789–95. <https://doi.org/10.1136/jnnp.2007.118786> PMID: 17965146
126. Zangaglia R, Pacchetti C, Pasotti C, Mancini F, Servello D, Sinforiani E, et al. Deep brain stimulation and cognitive functions in Parkinson's disease: A three-year controlled study. *Mov Disord.* 2009; 24(11):1621–8. <https://doi.org/10.1002/mds.22603> PMID: 19514093
127. Borden A, Wallon D, Lefaucheur R, Derrey S, Fetter D, Verin M, et al. Does early verbal fluency decline after STN implantation predict long-term cognitive outcome after STN-DBS in Parkinson's disease? *J Neurol Sci.* 2014; 346(1–2):299–302. <https://doi.org/10.1016/j.jns.2014.07.063> PMID: 25125047
128. Demeter G, Valalik I, Pajkossy P, Szollosi A, Lukacs A, Kemeny F, et al. The effect of deep brain stimulation of the subthalamic nucleus on executive functions: impaired verbal fluency and intact updating, planning and conflict resolution in Parkinson's disease. *Neurosci Lett.* 2017; 647:72–7. <https://doi.org/10.1016/j.neulet.2017.03.026> PMID: 28323092
129. Dick AS, Garic D, Graziano P, Tremblay P. The frontal aslant tract (FAT) and its role in speech, language and executive function. *Cortex.* 2019; 111:148–63. <https://doi.org/10.1016/j.cortex.2018.10.015> PMID: 30481666
130. Foki T, Hitzl D, Pirker W, Novak K, Pusswald G, Auff E, et al. Assessment of individual cognitive changes after deep brain stimulation surgery in Parkinson's disease using the Neuropsychological Test Battery Vienna short version. *Wien Klin Wochenschr.* 2017; 129(15–16):564–71. <https://doi.org/10.1007/s00508-017-1169-z> PMID: 28176003
131. Foley JA, Foltynie T, Zrinzo L, Hyam JA, Limousin P, Cipolotti L. Apathy and Reduced Speed of Processing Underlie Decline in Verbal Fluency following DBS. *Behav Neurol.* 2017; 2017:7348101. <https://doi.org/10.1155/2017/7348101> PMID: 28408788
132. Fyttagoridis A, Sjoberg RL, Astrom M, Fredricks A, Nyberg L, Blomstedt P. Effects of deep brain stimulation in the caudal zona incerta on verbal fluency. *Stereotact Funct Neurosurg.* 2013; 91(1):24–9. <https://doi.org/10.1159/000342497> PMID: 23154815
133. Le Goff F, Derrey S, Lefaucheur R, Borden A, Fetter D, Jan M, et al. Decline in verbal fluency after subthalamic nucleus deep brain stimulation in Parkinson's disease: a microlesion effect of the electrode trajectory? *J Parkinsons Dis.* 2015; 5(1):95–104. <https://doi.org/10.3233/JPD-140443> PMID: 25374271
134. Marshall DF, Strutt AM, Williams AE, Simpson RK, Jankovic J, York MK. Alternating verbal fluency performance following bilateral subthalamic nucleus deep brain stimulation for Parkinson's disease. *Eur J Neurol.* 2012; 19(12):1525–31. <https://doi.org/10.1111/j.1468-1331.2012.03759.x> PMID: 22632922
135. Rizzone MG, Fasano A, Daniele A, Zibetti M, Merola A, Rizzi L, et al. Long-term outcome of subthalamic nucleus DBS in Parkinson's disease: from the advanced phase towards the late stage of the disease? *Parkinsonism Relat Disord.* 2014; 20(4):376–81. <https://doi.org/10.1016/j.parkreldis.2014.01.012> PMID: 24508574
136. Smeding HM, Speelman JD, Huizenga HM, Schuurman PR, Schmand B. Predictors of cognitive and psychosocial outcome after STN DBS in Parkinson's Disease. *J Neurol Neurosurg Psychiatry.* 2011; 82(7):754–60. <https://doi.org/10.1136/jnnp.2007.140012> PMID: 19465417
137. Tanaka Y, Tsuboi T, Watanabe H, Kajita Y, Nakatsubo D, Fujimoto Y, et al. Articulation Features of Parkinson's Disease Patients with Subthalamic Nucleus Deep Brain Stimulation. *J Parkinsons Dis.* 2016; 6(4):811–9. <https://doi.org/10.3233/JPD-160838> PMID: 27662325
138. Williams AE, Arzola GM, Strutt AM, Simpson R, Jankovic J, York MK. Cognitive outcome and reliable change indices two years following bilateral subthalamic nucleus deep brain stimulation. *Parkinsonism Relat Disord.* 2011; 17(5):321–7. <https://doi.org/10.1016/j.parkreldis.2011.01.011> PMID: 21316292
139. Catalano Chiuve S, Fournet M, Wegrzyk J, Assal F, Burkhard PR, Laganaro M. Longitudinal study of speech and dual-task performance in Parkinson's disease patients treated with subthalamic nucleus

- deep brain stimulation. *Parkinsonism Relat Disord.* 2022; 97:75–8. <https://doi.org/10.1016/j.parkreldis.2022.03.003> PMID: 35349893
140. Greif TR, Askari A, Cook Maher A, Patil PG, Persad C. Anterior lead location predicts verbal fluency decline following STN-DBS in Parkinson's disease. *Parkinsonism Relat Disord.* 2021; 92:36–40. <https://doi.org/10.1016/j.parkreldis.2021.10.012> PMID: 34678718
  141. Philipson J, Blomstedt P, Hariz M, Jahanshahi M. Deep brain stimulation in the caudal zona incerta in patients with essential tremor: effects on cognition 1 year after surgery. *J Neurosurg.* 2019; 134(1):208–15. <https://doi.org/10.3171/2019.9.JNS191646> PMID: 31860827
  142. Tanaka Y, Tsuboi T, Watanabe H, Nakatsubo D, Maesawa S, Kato S, et al. Longitudinal Speech Change After Subthalamic Nucleus Deep Brain Stimulation in Parkinson's Disease Patients: A 2-Year Prospective Study. *J Parkinsons Dis.* 2020; 10(1):131–40. <https://doi.org/10.3233/JPD-191798> PMID: 31884493
  143. You Z, Wu YY, Wu R, Xu ZX, Wu X, Wang XP. Efforts of subthalamic nucleus deep brain stimulation on cognitive spectrum: From explicit to implicit changes in the patients with Parkinson's disease for 1 year. *CNS Neurosci Ther.* 2020; 26(9):972–80.
  144. Boel JA, Odekerken VJ, Schmand BA, Geurtsen GJ, Cath DC, Figuee M, et al. Cognitive and psychiatric outcome 3 years after globus pallidus pars interna or subthalamic nucleus deep brain stimulation for Parkinson's disease. *Parkinsonism Relat Disord.* 2016; 33:90–5. <https://doi.org/10.1016/j.parkreldis.2016.09.018> PMID: 27688200
  145. Follett KA, Weaver FM, Stern M, Hur K, Harris CL, Luo P, et al. Pallidal versus subthalamic deep-brain stimulation for Parkinson's disease. *N Engl J Med.* 2010; 362(22):2077–91. <https://doi.org/10.1056/NEJMoa0907083> PMID: 20519680
  146. Odekerken VJ, van Laar T, Staal MJ, Mosch A, Hoffmann CF, Nijssen PC, et al. Subthalamic nucleus versus globus pallidus bilateral deep brain stimulation for advanced Parkinson's disease (NSTAPS study): a randomised controlled trial. *Lancet Neurol.* 2013; 12(1):37–44. [https://doi.org/10.1016/S1474-4422\(12\)70264-8](https://doi.org/10.1016/S1474-4422(12)70264-8) PMID: 23168021
  147. Ehlen F, Vonberg I, Tiedt HO, Horn A, Fromm O, Kuhn AA, et al. Thalamic deep brain stimulation decelerates automatic lexical activation. *Brain Cogn.* 2017; 111:34–43. <https://doi.org/10.1016/j.bandc.2016.10.001> PMID: 27816778
  148. Costentin G, Derrey S, Gerardin E, Cruypheninck Y, Pressat-Laffouilhère T, Anouar Y, et al. White matter tracts lesions and decline of verbal fluency after deep brain stimulation in Parkinson's disease. *Hum Brain Mapp.* 2019; 40(9):2561–70. <https://doi.org/10.1002/hbm.24544> PMID: 30779251
  149. Saint-Cyr JA, Trepanier LL. Neuropsychologic assessment of patients for movement disorder surgery. *Mov Disord.* 2000; 15(5):771–83. [https://doi.org/10.1002/1531-8257\(200009\)15:5<771::aid-mds1003>3.0.co;2-y](https://doi.org/10.1002/1531-8257(200009)15:5<771::aid-mds1003>3.0.co;2-y) PMID: 11009179
  150. Jahanshahi M, Ardouin CM, Brown RG, Rothwell JC, Obeso J, Albanese A, et al. The impact of deep brain stimulation on executive function in Parkinson's disease. *Brain.* 2000; 123 (Pt 6):1142–54. <https://doi.org/10.1093/brain/123.6.1142> PMID: 10825353
  151. Wojtecki L, Timmermann L, Jörgens S, Südmeyer M, Maarouf M, Treuer H, et al. Frequency-Dependent Reciprocal Modulation of Verbal Fluency and Motor Functions in Subthalamic Deep Brain Stimulation. *Archives of Neurology.* 2006; 63(9):1273–6. <https://doi.org/10.1001/archneur.63.9.1273> PMID: 16966504
  152. Fagundes VC, Rieder CR, da Cruz AN, Beber BC, Portoguez MW. Deep Brain Stimulation Frequency of the Subthalamic Nucleus Affects Phonemic and Action Fluency in Parkinson's Disease. *Parkinsons Dis.* 2016; 2016:6760243. <https://doi.org/10.1155/2016/6760243> PMID: 28050309
  153. Ehlen F, Krugel LK, Vonberg I, Schoenecker T, Kuhn AA, Klostermann F. Intact lexicon running slowly—prolonged response latencies in patients with subthalamic DBS and verbal fluency deficits. *PLoS One.* 2013; 8(11):e79247. <https://doi.org/10.1371/journal.pone.0079247> PMID: 24236114
  154. Rinehardt E, Duff K, Schoenberg M, Mattingly M, Bharucha K, Scott J. Cognitive change on the repeatable battery of neuropsychological status (RBANS) in Parkinson's disease with and without bilateral subthalamic nucleus deep brain stimulation surgery. *Clin Neuropsychol.* 2010; 24(8):1339–54. <https://doi.org/10.1080/13854046.2010.521770> PMID: 20967688
  155. Castelli L, Rizzi L, Zibetti M, Angrisano S, Lanotte M, Lopiano L. Neuropsychological changes 1-year after subthalamic DBS in PD patients: A prospective controlled study. *Parkinsonism Relat Disord.* 2010; 16(2):115–8. <https://doi.org/10.1016/j.parkreldis.2009.08.010> PMID: 19775926
  156. Kaplan E GH, Weintraub S. The Boston naming test. 2nd ed. Lea & Febiger: Philadelphia; 1983.
  157. Warrington EK. The Graded Naming Test: A Restandardisation. *Neuropsychological Rehabilitation.* 2010; 7(2):143–6.



158. Martens H, Nuffelen G, Putte L, Wuyts F, Bodt M. Meten van spraakverstaanbaarheid op zinsniveau bij volwassenen met een spraakstoornis: introductie van het Nederlandstalig spraakverstaanbaarheidsonderzoek–zinsniveau (NSVO-Z) [Measuring sentence intelligibility in adults with a speech disorder: introducing the Dutch Sentence Intelligibility Assessment (DSIA)]. *Logopedie*. 2010; 23:21–6.
159. Wiig EH, & Secord W. Test of Language Competence—Expanded Edition (TLC-Expanded) [Database record]: APA PsycTests; 1989.
160. Huisingh R BM, Zachman L, et al. The word test—revised: a test of expressive vocabulary and semantics.: Illinois: Linguistics; 1990.
161. Batens K, De Letter M, Raedt R, Duyck W, Vanhoutte S, Van Roost D, et al. Subthalamic nucleus stimulation and spontaneous language production in Parkinson's disease: A double laterality problem. *Brain Lang*. 2015; 147:76–84. <https://doi.org/10.1016/j.bandl.2015.06.002> PMID: 26099950
162. Batens K, De Letter M, Raedt R, Duyck W, Vanhoutte S, Van Roost D, et al. The effects of subthalamic nucleus stimulation on semantic and syntactic performance in spontaneous language production in people with Parkinson's disease. *Journal of Neurolinguistics*. 2014; 32:31–41.
163. Bayram E, Yilmaz R, Qiu Y, Yalap OE, Aydin O, Ergenc HI, et al. The effect of Subthalamic nucleus deep brain stimulation on verb and noun naming in Turkish-Speaking Parkinson's disease patients. *Brain Lang*. 2021; 212:104865. <https://doi.org/10.1016/j.bandl.2020.104865> PMID: 33220645
164. Castner JE, Chenery HJ, Silburn PA, Coyne TJ, Sinclair F, Smith ER, et al. Effects of subthalamic deep brain stimulation on noun/verb generation and selection from competing alternatives in Parkinson's disease. *J Neurol Neurosurg Psychiatry*. 2008; 79(6):700–5. <https://doi.org/10.1136/jnnp.2007.118729> PMID: 17911182
165. Silveri MC, Ciccarelli N, Baldonero E, Piano C, Zinno M, Soleti F, et al. Effects of stimulation of the subthalamic nucleus on naming and reading nouns and verbs in Parkinson's disease. *Neuropsychologia*. 2012; 50(8):1980–9. <https://doi.org/10.1016/j.neuropsychologia.2012.04.023> PMID: 22575085
166. Castner JE, Chenery HJ, Copland DA, Coyne TJ, Sinclair F, Silburn PA. Semantic and affective priming as a function of stimulation of the subthalamic nucleus in Parkinson's disease. *Brain*. 2007; 130(Pt 5):1395–407. <https://doi.org/10.1093/brain/awm059> PMID: 17430981
167. Ehlen F, Vonberg I, Kuhn AA, Klostermann F. Effects of thalamic deep brain stimulation on spontaneous language production. *Neuropsychologia*. 2016; 89:74–82. <https://doi.org/10.1016/j.neuropsychologia.2016.05.028> PMID: 27267813
168. Becker J, Thies T, Petry-Schmelzer JN, Dembek TA, Reker P, Mucke D, et al. The effects of thalamic and posterior subthalamic deep brain stimulation on speech in patients with essential tremor—A prospective, randomized, doubleblind crossover study. *Brain Lang*. 2020; 202:104724. <https://doi.org/10.1016/j.bandl.2019.104724> PMID: 31884313
169. Klostermann F, Ehlen F, Vesper J, Nubel K, Gross M, Marzinzik F, et al. Effects of subthalamic deep brain stimulation on dysarthrophonia in Parkinson's disease. *J Neurol Neurosurg Psychiatry*. 2008; 79(5):522–9. <https://doi.org/10.1136/jnnp.2007.123323> PMID: 17766427
170. Martel-Sauvageau V, Tjaden K. Vocalic transitions as markers of speech acoustic changes with STN-DBS in Parkinson's Disease. *J Commun Disord*. 2017; 70:1–11. <https://doi.org/10.1016/j.jcomdis.2017.10.001> PMID: 29032347
171. Barbara H, Jacobson AJ, Cynthia Grywalski, Alice Silbergleit Gary, Jacobsen MSB. *American Journal of Speech-Language Pathology*. 1997; 6(3):66–70.
172. Morello A, Beber BC, Fagundes VC, Cielo CA, Rieder CRM. Dysphonia and Dysarthria in People With Parkinson's Disease After Subthalamic Nucleus Deep Brain Stimulation: Effect of Frequency Modulation. *J Voice*. 2020; 34(3):477–84. <https://doi.org/10.1016/j.jvoice.2018.10.012> PMID: 30454944
173. Yamaguchi H, Shrivastav R, Andrews ML, Niimi S. A comparison of voice quality ratings made by Japanese and American listeners using the GRBAS scale. *Folia Phoniatri Logop*. 2003; 55(3):147–57. <https://doi.org/10.1159/000070726> PMID: 12771466
174. Becker J, Barbe MT, Hartinger M, Dembek TA, Pochmann J, Wirths J, et al. The Effect of Uni- and Bilateral Thalamic Deep Brain Stimulation on Speech in Patients With Essential Tremor: Acoustics and Intelligibility. *Neuromodulation*. 2017; 20(3):223–32.
175. Pahwa R, Lyons KE, Wilkinson SB, Simpson RK Jr., Ondo WG, Tarsy D, et al. Long-term evaluation of deep brain stimulation of the thalamus. *J Neurosurg*. 2006; 104(4):506–12. <https://doi.org/10.3171/jns.2006.104.4.506> PMID: 16619653
176. Putzke JD, Uitti RJ, Obwegeser AA, Wszolek ZK, Wharen RE. Bilateral thalamic deep brain stimulation: midline tremor control. *J Neurol Neurosurg Psychiatry*. 2005; 76(5):684–90. <https://doi.org/10.1136/jnnp.2004.041434> PMID: 15834027
177. Fabbri M, Zibetti M, Ferrero G, Accornero A, Guimaraes I, Rizzone MG, et al. Is lowering stimulation frequency a feasible option for subthalamic deep brain stimulation in Parkinson's disease patients with



- dysarthria? *Parkinsonism Relat Disord.* 2019; 64:242–8. <https://doi.org/10.1016/j.parkreldis.2019.04.018> PMID: 31060986
178. Fabbri M, Natale F, Artusi CA, Romagnolo A, Bozzali M, Giulietti G, et al. Deep brain stimulation fine-tuning in Parkinson's disease: Short pulse width effect on speech. *Parkinsonism Relat Disord.* 2021; 87:130–4. <https://doi.org/10.1016/j.parkreldis.2021.05.007> PMID: 34034153
  179. Yilmaz A, Sarac ET, Aydinli FE, Yildizgoren MT, Okuyucu EE, Serarslan Y. Investigating the effect of STN-DBS stimulation and different frequency settings on the acoustic-articulatory features of vowels. *Neurol Sci.* 2018; 39(10):1683–9. <https://doi.org/10.1007/s10072-018-3479-y> PMID: 29938340
  180. Moreau C, Pennel-Ployart O, Pinto S, Plachez A, Annic A, Viallet F, et al. Modulation of dysarthropneumophonia by low-frequency STN DBS in advanced Parkinson's disease. *Mov Disord.* 2011; 26(4):659–63. <https://doi.org/10.1002/mds.23538> PMID: 21506146
  181. Abeyesekera A, Adams S, Mancinelli C, Knowles T, Gilmore G, Delrobaei M, et al. Effects of Deep Brain Stimulation of the Subthalamic Nucleus Settings on Voice Quality, Intensity, and Prosody in Parkinson's Disease: Preliminary Evidence for Speech Optimization. *Can J Neurol Sci.* 2019; 46(3):287–94. <https://doi.org/10.1017/cjn.2019.16> PMID: 30905324
  182. Knowles T, Adams S, Abeyesekera A, Mancinelli C, Gilmore G, Jog M. Deep Brain Stimulation of the Subthalamic Nucleus Parameter Optimization for Vowel Acoustics and Speech Intelligibility in Parkinson's Disease. *J Speech Lang Hear Res.* 2018; 61(3):510–24. [https://doi.org/10.1044/2017\\_JSLHR-S-17-0157](https://doi.org/10.1044/2017_JSLHR-S-17-0157) PMID: 29471373
  183. Ahn JS, Van Lancker Sittis D, Sittis JJ. Effects of Deep Brain Stimulation on Pausing During Spontaneous Speech in Parkinson's Disease. *J Med Speech Lang Pathol.* 2014; 21(3):179–86. PMID: 26848252
  184. Behroozmand R, Johari K, Kelley RM, Kapnoula EC, Narayanan NS, Greenlee JDW. Effect of deep brain stimulation on vocal motor control mechanisms in Parkinson's disease. *Parkinsonism Relat Disord.* 2019; 63:46–53. <https://doi.org/10.1016/j.parkreldis.2019.03.002> PMID: 30871801
  185. D'Alatri L, Paludetti G, Contarino MF, Galla S, Marchese MR, Bentivoglio AR. Effects of bilateral subthalamic nucleus stimulation and medication on parkinsonian speech impairment. *J Voice.* 2008; 22(3):365–72. <https://doi.org/10.1016/j.jvoice.2006.10.010> PMID: 17368837
  186. Dromey C, Warrick P, Irish J. The influence of pitch and loudness changes on the acoustics of vocal tremor. *J Speech Lang Hear Res.* 2002; 45(5):879–90. [https://doi.org/10.1044/1092-4388\(2002\)071](https://doi.org/10.1044/1092-4388(2002)071) PMID: 12381046
  187. Gentil M, Tournier CL, Pollak P, Benabid AL. Effect of bilateral subthalamic nucleus stimulation and dopatherapy on oral control in Parkinson's disease. *Eur Neurol.* 1999; 42(3):136–40. <https://doi.org/10.1159/000008087> PMID: 10529538
  188. Martel Sauvageau V, Macoir J, Langlois M, Prud'Homme M, Cantin L, Roy JP. Changes in vowel articulation with subthalamic nucleus deep brain stimulation in dysarthric speakers with Parkinson's disease. *Parkinsons Dis.* 2014; 2014:487035. <https://doi.org/10.1155/2014/487035> PMID: 25400977
  189. Mucke D, Hermes A, Roettger TB, Becker J, Niemann H, Dembek TA, et al. The effects of Thalamic Deep Brain Stimulation on speech dynamics in patients with Essential Tremor: An articulographic study. *PLoS One.* 2018; 13(1):e0191359. <https://doi.org/10.1371/journal.pone.0191359> PMID: 29360867
  190. Romann AJ, Beber BC, Cielo CA, Rieder CRM. Acoustic Voice Modifications in Individuals with Parkinson Disease Submitted to Deep Brain Stimulation. *Int Arch Otorhinolaryngol.* 2019; 23(2):203–8. <https://doi.org/10.1055/s-0038-1675392> PMID: 30956706
  191. Rousseaux M, Krystkowiak P, Kozlowski O, Ozsancak C, Blond S, Destee A. Effects of subthalamic nucleus stimulation on parkinsonian dysarthria and speech intelligibility. *J Neurol.* 2004; 251(3):327–34. <https://doi.org/10.1007/s00415-004-0327-1> PMID: 15015014
  192. Skodda S, Gronheit W, Schlegel U, Sudmeyer M, Schnitzler A, Wojtecki L. Effect of subthalamic stimulation on voice and speech in Parkinson's disease: for the better or worse? *Front Neurol.* 2014; 4:218. <https://doi.org/10.3389/fneur.2013.00218> PMID: 24454305
  193. Yasar OC, Ozturk S, Kemal O, Kocabicak E. Effects of Subthalamic Nucleus Deep Brain Stimulation Surgery on Voice and Formant Frequencies of Vowels in Turkish. *Turk Neurosurg.* 2022; 32(5):764–72. <https://doi.org/10.5137/1019-5149.JTN.36134-21.2> PMID: 35416268
  194. Eklund E, Qvist J, Sandstrom L, Viklund F, Van Doorn J, Karlsson F. Perceived articulatory precision in patients with Parkinson's disease after deep brain stimulation of subthalamic nucleus and caudal zona incerta. *Clin Linguist Phon.* 2015; 29(2):150–66. <https://doi.org/10.3109/02699206.2014.971192> PMID: 25333411
  195. Lundgren S, Saeys T, Karlsson F, Olofsson K, Blomstedt P, Linder J, et al. Deep brain stimulation of caudal zona incerta and subthalamic nucleus in patients with Parkinson's disease: effects on voice intensity. *Parkinsons Dis.* 2011; 2011:658956. <https://doi.org/10.4061/2011/658956> PMID: 22028987

196. Chang WS, Chung JC, Kim JP, Chang JW. Simultaneous thalamic and posterior subthalamic electrode insertion with single deep brain stimulation electrode for essential tremor. *Neuromodulation*. 2013; 16(3):236–43; discussion 43. <https://doi.org/10.1111/j.1525-1403.2012.00503.x> PMID: 22985104
197. Tripoliti E, Zrinzo L, Martinez-Torres I, Frost E, Pinto S, Foltynie T, et al. Effects of subthalamic stimulation on speech of consecutive patients with Parkinson disease. *Neurology*. 2011; 76(1):80–6. <https://doi.org/10.1212/WNL.0b013e318203e7d0> PMID: 21068426
198. Tsuboi T, Watanabe H, Tanaka Y, Ohdake R, Hattori M, Kawabata K, et al. Early detection of speech and voice disorders in Parkinson's disease patients treated with subthalamic nucleus deep brain stimulation: a 1-year follow-up study. *J Neural Transm (Vienna)*. 2017; 124(12):1547–56. <https://doi.org/10.1007/s00702-017-1804-x> PMID: 29098450
199. Chiu SY, Tsuboi T, Hegland KW, Herndon NE, Shukla AW, Patterson A, et al. Dysarthria and Speech Intelligibility Following Parkinson's Disease Globus Pallidus Internus Deep Brain Stimulation. *J Parkinsons Dis*. 2020; 10(4):1493–502. <https://doi.org/10.3233/JPD-202246> PMID: 32955467
200. Erickson-DiRenzo E, Kuijper FM, Barbosa DAN, Lim EA, Lin PT, Lising MA, et al. Multiparametric laryngeal assessment of the effect of thalamic deep brain stimulation on essential vocal tremor. *Parkinsonism Relat Disord*. 2020; 81:106–12. <https://doi.org/10.1016/j.parkreldis.2020.10.026> PMID: 33120071
201. McDermott KB, Petersen SE, Watson JM, Ojemann JG. A procedure for identifying regions preferentially activated by attention to semantic and phonological relations using functional magnetic resonance imaging. *Neuropsychologia*. 2003; 41(3):293–303. [https://doi.org/10.1016/s0028-3932\(02\)00162-8](https://doi.org/10.1016/s0028-3932(02)00162-8) PMID: 12457755
202. Gourovitch ML, Kirkby BS, Goldberg TE, Weinberger DR, Gold JM, Esposito G, et al. A comparison of rCBF patterns during letter and semantic fluency. *Neuropsychology*. 2000; 14(3):353–60. <https://doi.org/10.1037//0894-4105.14.3.353> PMID: 10928738
203. Birn RM, Kenworthy L, Case L, Caravella R, Jones TB, Bandettini PA, et al. Neural systems supporting lexical search guided by letter and semantic category cues: a self-paced overt response fMRI study of verbal fluency. *Neuroimage*. 2010; 49(1):1099–107. <https://doi.org/10.1016/j.neuroimage.2009.07.036> PMID: 19632335
204. Almairac F, Herbet G, Moritz-Gasser S, de Champfleury NM, Duffau H. The left inferior fronto-occipital fasciculus subserves language semantics: a multilevel lesion study. *Brain Struct Funct*. 2015; 220(4):1983–95. <https://doi.org/10.1007/s00429-014-0773-1> PMID: 24744151
205. Catani M, Mesulam MM, Jakobsen E, Malik F, Martersteck A, Wieneke C, et al. A novel frontal pathway underlies verbal fluency in primary progressive aphasia. *Brain*. 2013; 136(Pt 8):2619–28. <https://doi.org/10.1093/brain/awt163> PMID: 23820597
206. Li M, Zhang Y, Song L, Huang R, Ding J, Fang Y, et al. Structural connectivity subserving verbal fluency revealed by lesion-behavior mapping in stroke patients. *Neuropsychologia*. 2017; 101:85–96. <https://doi.org/10.1016/j.neuropsychologia.2017.05.008> PMID: 28495601
207. Hojlund A, Petersen MV, Sridharan KS, Ostergaard K. Worsening of Verbal Fluency After Deep Brain Stimulation in Parkinson's Disease: A Focused Review. *Comput Struct Biotechnol J*. 2017; 15:68–74. <https://doi.org/10.1016/j.csbj.2016.11.003> PMID: 27994799
208. Garcia LD'Alessandro G, Fernagut P-O, Bioulac B, Hammond C. Impact of High-Frequency Stimulation Parameters on the Pattern of Discharge of Subthalamic Neurons. *Journal of Neurophysiology*. 2005; 94(6):3662–9. <https://doi.org/10.1152/jn.00496.2005> PMID: 16148275
209. Thames AD, Foley JM, Wright MJ, Panos SE, Ettenhofer M, Ramezani A, et al. Basal ganglia structures differentially contribute to verbal fluency: Evidence from Human Immunodeficiency Virus (HIV)-infected adults. *Neuropsychologia*. 2012; 50(3):390–5. <https://doi.org/10.1016/j.neuropsychologia.2011.12.010> PMID: 22223078
210. Heber IA, Coenen VA, Reetz K, Schulz JB, Hoellig A, Fimm B, et al. Cognitive effects of deep brain stimulation for essential tremor: evaluation at 1 and 6 years. *J Neural Transm (Vienna)*. 2013; 120(11):1569–77. <https://doi.org/10.1007/s00702-013-1030-0> PMID: 23649123
211. Schuurman PR, Bruins J, Merkus MP, Bosch DA, Speelman JD. A comparison of neuropsychological effects of thalamotomy and thalamic stimulation. *Neurology*. 2002; 59(8):1232–9. <https://doi.org/10.1212/01.wnl.0000031425.37014.55> PMID: 12391352
212. John KD, Wylie SA, Dawant BM, Rodriguez WJ, Pibbs FT, Bradley EB, et al. Deep brain stimulation effects on verbal fluency dissociated by target and active contact location. *Ann Clin Transl Neurol*. 2021; 8(3):613–22. <https://doi.org/10.1002/acn3.51304> PMID: 33596331
213. Lin Z, Zhang C, Li D, Sun B. Lateralized effects of deep brain stimulation in Parkinson's disease: evidence and controversies. *npj Parkinson's Disease*. 2021; 7(1). <https://doi.org/10.1038/s41531-021-00209-3> PMID: 34294724

214. Robinson GA. Primary progressive dynamic aphasia and Parkinsonism: Generation, selection and sequencing deficits. *Neuropsychologia*. 2013; 51(13):2534–47. <https://doi.org/10.1016/j.neuropsychologia.2013.09.038> PMID: 24113151
215. Benton Kd, Sivan A.B. *Multilingual Aphasia Examination: AJA associates*; 1994.
216. Benton AL HKd Sivan AB. *Multilingual aphasia examination (3rd Edition) (MAE)*. 1994.
217. Di Tella S, Baglio F, Cabinio M, Nemni R, Traficante D, Silveri MC. Selection Processing in Noun and Verb Production in Left- and Right-Sided Parkinson's Disease Patients. *Front Psychol*. 2018; 9:1241. <https://doi.org/10.3389/fpsyg.2018.01241> PMID: 30079043
218. Abrahams S, Goldstein LH, Simmons A, Brammer MJ, Williams SCR, Giampietro VP, et al. Functional magnetic resonance imaging of verbal fluency and confrontation naming using compressed image acquisition to permit overt responses. *Human Brain Mapping*. 2003; 20(1):29–40. <https://doi.org/10.1002/hbm.10126> PMID: 12953304
219. Okada K, Hickok G. Left posterior auditory-related cortices participate both in speech perception and speech production: Neural overlap revealed by fMRI. *Brain and Language*. 2006; 98(1):112–7. <https://doi.org/10.1016/j.bandl.2006.04.006> PMID: 16716388
220. Fridriksson J, Morrow KL, Moser D, Baylis GC. Age-Related Variability in Cortical Activity During Language Processing. *Journal of Speech, Language, and Hearing Research*. 2006; 49(4):690–7. [https://doi.org/10.1044/1092-4388\(2006/050\)](https://doi.org/10.1044/1092-4388(2006/050)) PMID: 16908869
221. Rothlind JC, York MK, Carlson K, Luo P, Marks WJ Jr, Weaver FM, et al. Neuropsychological changes following deep brain stimulation surgery for Parkinson's disease: comparisons of treatment at pallidal and subthalamic targets versus best medical therapy. *J Neurol Neurosurg Psychiatry*. 2015; 86(6):622–9. <https://doi.org/10.1136/jnnp-2014-308119> PMID: 25185211
222. Tornqvist AL, Schalen L, Rehncrona S. Effects of different electrical parameter settings on the intelligibility of speech in patients with Parkinson's disease treated with subthalamic deep brain stimulation. *Mov Disord*. 2005; 20(4):416–23. <https://doi.org/10.1002/mds.20348> PMID: 15593314
223. Hammer MJ, Barlow SM, Lyons KE, Pahwa R. Subthalamic nucleus deep brain stimulation changes velopharyngeal control in Parkinson's disease. *J Commun Disord*. 2011; 44(1):37–48. <https://doi.org/10.1016/j.jcomdis.2010.07.001> PMID: 20708741
224. Sandström L, Schalling E, Karlsson F, Blomstedt P, Hartelius L. Speech Function Following Deep Brain Stimulation of the Caudal Zona Incerta: Effects of Habitual and High-Amplitude Stimulation. *Journal of Speech, Language, and Hearing Research*. 2021; 64(6S):2121–33. [https://doi.org/10.1044/2020\\_JSLHR-20-00256](https://doi.org/10.1044/2020_JSLHR-20-00256) PMID: 33647213
225. Ramirez-Zamora A, Kahn M, Campbell J, DeLaCruz P, Pilitsis JG. Interleaved programming of subthalamic deep brain stimulation to avoid adverse effects and preserve motor benefit in Parkinson's disease. *J Neurol*. 2015; 262(3):578–84. <https://doi.org/10.1007/s00415-014-7605-3> PMID: 25504447
226. Akram H, Sotiropoulos SN, Jbabdi S, Georgiev D, Mahlknecht P, Hyam J, et al. Subthalamic deep brain stimulation sweet spots and hyperdirect cortical connectivity in Parkinson's disease. *NeuroImage*. 2017; 158:332–45. <https://doi.org/10.1016/j.neuroimage.2017.07.012> PMID: 28711737
227. Mahlknecht P, Akram H, Georgiev D, Tripoliti E, Candelario J, Zacharia A, et al. Pyramidal tract activation due to subthalamic deep brain stimulation in Parkinson's disease. *Movement Disorders*. 2017; 32(8):1174–82. <https://doi.org/10.1002/mds.27042> PMID: 28590508
228. Hertegard S, Granqvist S, Lindestad PA. Botulinum toxin injections for essential voice tremor. *Ann Otol Rhinol Laryngol*. 2000; 109(2):204–9. <https://doi.org/10.1177/000348940010900216> PMID: 10685574
229. Skodda S. Effect of deep brain stimulation on speech performance in Parkinson's disease. *Parkinsons Dis*. 2012; 2012:850596. <https://doi.org/10.1155/2012/850596> PMID: 23227426
230. Karlsson F, Blomstedt P, Olofsson K, Linder J, Nordh E, van Doorn J. Control of phonatory onset and offset in Parkinson patients following deep brain stimulation of the subthalamic nucleus and caudal zona incerta. *Parkinsonism Relat Disord*. 2012; 18(7):824–7. <https://doi.org/10.1016/j.parkreldis.2012.03.025> PMID: 22522070
231. Rossi M, Bruno V, Arena J, Cammarota A, Merello M. Challenges in PD Patient Management After DBS: A Pragmatic Review. *Mov Disord Clin Pract*. 2018; 5(3):246–54. <https://doi.org/10.1002/mdc3.12592> PMID: 30363375
232. Tsai ST, Lin SH, Chou YC, Pan YH, Hung HY, Li CW, et al. Prognostic factors of subthalamic stimulation in Parkinson's disease: a comparative study between short- and long-term effects. *Stereotact Funct Neurosurg*. 2009; 87(4):241–8. <https://doi.org/10.1159/000225977> PMID: 19556833
233. Witt K, Granert O, Daniels C, Volkmann J, Falk D, van Eimeren T, et al. Relation of lead trajectory and electrode position to neuropsychological outcomes of subthalamic neurostimulation in Parkinson's disease: results from a randomized trial. *Brain*. 2013; 136(Pt 7):2109–19. <https://doi.org/10.1093/brain/awt151> PMID: 23801735
